1 **Title: “Functional characterization of putative ecdysone transporters in lepidopteran pests”**

2

3

4 **Authors**

5 George-Rafael Samantsidis<sup>1,2</sup>, Melina Fotiadou<sup>2</sup>, Savvas Tzavellas<sup>2</sup>, Sven Geibel<sup>3</sup>, Ralf Nauen<sup>3</sup>, Luc Swevers<sup>4</sup>, Shane  
6 Denecke<sup>1,5, &</sup>, John Vontas<sup>1,6&</sup>

7

8 <sup>1</sup>Institute of Molecular Biology and Biotechnology, Foundation for Research and Technology-Hellas, Heraklion,  
9 Greece

10 <sup>2</sup>Department of Biology, University of Crete, Vassilika Vouton, 71409 Heraklion, Crete, Greece

11 <sup>3</sup>R&D Pest Control, Bayer AG, Crop Science Division, Monheim, Germany

12 <sup>4</sup>Insect Molecular Genetics and Biotechnology, National Centre for Scientific Research Demokritos, Institute of  
13 Biosciences and Applications, 15310 Athens, Greece

14 <sup>6</sup>Pesticide Science Lab, Department of Crop Science, Agricultural University of Athens, Greece

15 <sup>5</sup>Department of Pathobiology, University of Pennsylvania, Philadelphia, United states

16

17 & equal last authors

18 \* correspondence: Shane Denecke ([sdenecke@upenn.edu](mailto:sdenecke@upenn.edu)) or John Vontas ([vontas@imbb.forth.gr](mailto:vontas@imbb.forth.gr))

19

20 **Authors' contribution:**

21 S.D and J.V conceived the project, S.D. and G-R.S designed the experiments, G-R.S performed the CRISPR in cell lines  
22 and generated stable cells, G-R.S and S.T. performed the luciferase assays in cell cultures, G-R.S performed the gene  
23 expression, cell death analysis and immunofluorescence in cell lines, S.D. and M.F. performed the phylogenetic  
24 analysis, M.F. performed the CRISPR in *S. frugiperda*. G-R.S, S.D and J.V analyzed the results. G-R.S, M.F, S.D and J.V.  
25 wrote the manuscript. The manuscript has been revised and accepted by all authors.

26

27

## 28 **Financial Support**

29 This work was supported by a joint collaboration between Institute of Molecular Biology and Biotechnology  
30 (IMBB/FORTH) and Bayer AG (Monheim, Germany), and by Greece and the European Union (European Social Fund-  
31 ESF) through the Operational Programme ‘Human Resources Development, Education and Lifelong Learning’ in the  
32 context of the project ‘Strengthening Human Resources Research Potential via Doctorate Research’ (MIS-5000432),  
33 implemented by the Greek State Scholarships Foundation (IKY) as a scholarship to G.-R.S.

34

35

## 36 **Abstract**

37

38 The insect steroid hormone ecdysone plays a critical role in insect development. Several recent studies have shown  
39 that ecdysone is transported through **Organic Anion Transporting Polypeptides (OATPs)** in insects such as flies and  
40 mosquitoes. However, the conservation of this mechanism across other arthropods and the role of this transporter  
41 in canonical ecdysone pathways are less well studied. Herein we functionally characterized the putative ecdysone  
42 transporter OATP74D from two major agricultural moth pests: *Helicoverpa armigera* (cotton bollworm) and  
43 *Spodoptera frugiperda* (fall armyworm). Phylogenetic analysis of OATP transporters across the superphylum  
44 Ecdysozoa revealed that *Oatp74D* is well represented among arthropod species and appeared only at the root of the  
45 arthropod lineage. Partial disruption of *Oatp74D* in *S. frugiperda* decreased embryo hatching rate and larval survival,  
46 suggesting that this gene is essential for development *in vivo*. Depletion and re-expression of *OatP74D* in the  
47 lepidoptera cell line RP-HzGUT-AW1(MG) confirmed the gene’s role in ecdysone import and demonstrated that  
48 OATP74D is essential for the transcriptional activation of ecdysone responsive genes including *caspase-3*, implicating  
49 this transporter in cell death pathways. Establishment of a simple and robust luciferase assay using the RP-HzGUT-  
50 AW1(MG) cell line demonstrated that both HaOATP74D and SfOATP74D are inhibited by rifampicin, a well-known  
51 organic anion transporter inhibitor. Overall, this work sheds more light on ecdysone uptake mechanisms across  
52 insect species and broadens our knowledge of the physiological roles of OATPs in the transportation of endogenous  
53 substrates.

54

55

## 56 **Author Summary**

57 The insect steroid hormone ecdysone is critical in regulating many aspects of insects' life, including development and  
58 reproduction. A passive diffusion model was never functionally resolved, but was strongly supported until an organic  
59 anion transporting polypeptide was identified to mediate the transport of the hormone. The OATP74D, belonging to  
60 the Solute carrier superfamily, has been identified and functionally characterized for the first time in *Drosophila*  
61 *melanogaster*. Although phylogenetic analysis suggests that the *Drosophila Oatp74D* is probably conserved among  
62 several insect species, the theory for transporter mediated ecdysone uptake cannot be generalized to all insects  
63 without concrete proof. In here we provide functional evidence that the *Oatp74D* of two lepidopteran pest species:  
64 *Helicoverpa armigera* and *Spodoptera frugiperda*, is highly required for insect survival and development.  
65 Furthermore, we reveal that the OATP74D is necessary to regulate the expression of several ecdysone response  
66 genes, including *caspase-3* which is involved in programmed cell death. In addition, we have developed a cell-based  
67 platform for screening chemical compounds against the lepidopteran orthologs of *Oat74D* and rifampicin was  
68 functionally shown to inhibit ecdysone uptake. Taken all together, our study reveals that *Oatp74D* is conserved  
69 among several arthropod species in the ecdysone pathway and given the high necessity for an effective control of  
70 these two lepidopteran species, we hypothesized that OATP74D could serve as a possible drug target in those two  
71 species.

72

## 73 **Introduction**

74 Steroid hormones are molecules acting as chemical cues governing and coordinating several biological  
75 processes in insect physiology, metabolism and development. In hemi- and holometabolous insects the most critical  
76 and well-studied steroid hormone is ecdysone [1]. Ecdysone, as a typical steroid hormone, acts either by membrane  
77 receptors, which lead to the initiation and modulation of signaling transduction pathways, and/or by their cognate  
78 nuclear receptors, which act as transcription factors to selectively regulate target gene expression [2, 3].

79 During insects' life cycle, precisely controlled and tightly regulated ecdysone pulses regulate transitions  
80 between developmental stages, beginning from the egg hatching stage until pupation [4, 5]. Following secretion  
81 from the prothoracic gland, ecdysone is activated to 20E and incorporated into the target cells and initiates a

82 signaling pathway, by binding to the nuclear receptors ecdysone receptor (EcR) and ultraspiracle (USP) which form a  
83 heterodimeric transcription factor that initiates a gene expression cascade [1, 6]. Among a large number of tissue  
84 specific genes implicated in insect development and regulated by ecdysone, there is a core set of ubiquitously  
85 expressed transcription factors induced by the steroid hormone [7]. These are encoded by the early response genes  
86 such as the *Eip74A* and *Eip75B*, which in turn lead to the activation of the early late response genes that also express  
87 transcription factors like the nuclear receptors HR3 and  $\beta$ Ftz-F1, the zinc finger protein Broad and the helix-turn-helix  
88 factor E93 [8, 9]. This regulatory hierarchy of genes respond to 20-HE and function as molecular determinants of  
89 developmental timing and amplification of the hormone signal in order to ensure successful molting and  
90 metamorphosis by initiating diverse and tissue specific-dependent biological processes [10].

91 In holometabolous insects, a high titer of ecdysone that is released at the final larval stage is necessary for  
92 the development of adult structures. While it can promote differentiation and pattern specification through cell  
93 cycle regulation in imaginal tissues [11, 12, 13], ecdysone can also initiate programmed cell death in certain larval  
94 tissues that will not be required in the adult stage. Secretion of ecdysone commits larvae to pupariation and  
95 cessation of growth by orchestrating processes such as proliferation, differentiation, and cell death to ensure the  
96 proper development of insects. With regard to cell death, ecdysone regulates the proper activation of programmed  
97 cell death (autophagy and apoptosis) in obsolete larval tissues like abdominal muscles, midgut and salivary glands of  
98 holometabolous insects like *Drosophila melanogaster* [14, 15], *Bombyx mori* and *Helicoverpa armigera* [16, 17].  
99 Furthermore, ecdysone-induced programmed cell death seems to be necessary for other tissues that undergo  
100 remodeling during larval-to-pupal transition, like fat body and certain types of neurons [18]. Transcriptional  
101 regulation of genes related with autophagy and apoptosis is governed by ecdysone-induced transcription factors like  
102 EcR, BR-C,  $\beta$ Ftz-F1, E75A and E75B [18]. Studies in Lepidoptera also indicated that ecdysone is involved in the  
103 regulation of both autophagy and apoptosis, which seem to be equally implicated in midgut degradation, and  
104 blockage of the pathway causes a severe delay in metamorphosis and lethality [19, 13]. When studying insect cell  
105 lines a variety of responses including effects on differentiation and proliferation has been attributed to ecdysone  
106 [20].

107 Although a large part of the regulatory network of ecdysone signaling has been resolved, there was until  
108 recently limited knowledge about ecdysone transport mechanisms. For many years, a general theory for simple  
109 passive diffusion of steroid hormones prevailed, but this started to be rejected when genetic screens in *Drosophila*

110 identified the presence of transporters that mediate the transport of ecdysone. E23, a member of the ATP-Binding  
111 Cassette G (ABCG) protein subfamily, mediates the export of ecdysone in order to regulate the concentration of the  
112 hormone into the target cells after executing its function [21]. *Atet*, which also belongs to the ABC protein family,  
113 was detected in the prothoracic gland of *Drosophila* and was shown to be involved in importing ecdysone into  
114 vesicles which are released by calcium stimulated exocytosis to reach hemolymph [22]. Furthermore, additional  
115 work indicated that target cells use an active transport mechanism for ecdysone uptake [23, 24]. Organic anion  
116 transporting polypeptide 74d (OATP74D), which belongs to the SLCO family of the Solute Carrier (SLC) transporters,  
117 was found to be critical for larval development in *Drosophila*, suggested by the larval arrest observed at the L1 stage  
118 when the gene was eliminated, a phenotype that resembled EcR loss of function [24, 25]. Furthermore, OATP74D  
119 was found to regulate the ecdysone signaling pathway and to be necessary for ecdysone-dependent gene expression  
120 in cultured cells [24]. It is noteworthy to mention that although three additional OATPs mediating ecdysone import  
121 have been identified in *Drosophila*, they were dispensable compared to OATP74D (26). Ecdysone was suggested as a  
122 substrate for different OATPs, and this has been demonstrated also in mosquitoes which lack an OATP74D ortholog  
123 [26]. Considering that human OATPs have been functionally associated with hormone transport [27, 28], it could be  
124 suggested that the mechanism of cellular uptake of hormones via OATPs is conserved. However, this requires further  
125 functional proof given that a) the OATP transporter family differs significantly among species [29] and b) the case of  
126 hormonal transport in insects has been functionally validated in *Drosophila* and more recently in mosquitoes [26],  
127 yet limited information exists for other insect species.

128 *Helicoverpa armigera* and *Spodoptera frugiperda* (Lepidoptera: Noctuidae) are two major agricultural pests  
129 damaging several economically important cultivated crops around the world [30, 31]. Most of the control strategies  
130 employed to date rely on the use of microbial or small molecule insecticides which are administered orally during  
131 the larval stages [31, 32]. Among the several existing compounds, those targeting insect development (such as insect  
132 growth regulators, IGRs) are often insect specific . IGRs include the EcR agonists known to activate ecdysone  
133 signaling precociously, leading to developmental defects and finally death [32]. Although there are several reports  
134 regarding the developmental role of the ecdysone pathway in lepidopteran pests [6], the knowledge about transport  
135 and cellular uptake of the steroid hormone in these species is limited.

136 Here, we tried to analyze the evolution of *Oatp74D* among Ecdysozoa. We further characterized the  
137 OATP74D transporters of two lepidopteran species, *H. armigera* and *S. frugiperda*, and showed that the transporter

138 is essential for ecdysone uptake as well as for insect development and survival. Finally, we have developed a cell-  
139 based assay, which from a biotechnological aspect could be used for high-throughput screening of inhibitors serving  
140 as putative insecticide leads.

## 141 2. Results

### 142 2.1 Phylogenetic analysis of OATP74D in arthropod species

143 Organisms that utilize ecdysteroids, including arthropods and nematodes, taxonomically belong to the group  
144 Ecdysozoa and undergo the process of molting during their development. Based on our knowledge that ecdysone  
145 transportation is mediated by OATP74D in the arthropod *D. melanogaster* while the nematode *C. elegans* does not  
146 carry an *Oatp74D* ortholog [24], we aimed to identify the appearance of this gene during the evolution of Ecdysozoa.  
147 For this reason, a rooted phylogenetic tree was constructed using OATPs of representative species of Ecdysozoa (S1  
148 Table). The *Oatp74D* orthologs were clustered into a clade that includes the functionally characterized ortholog of *D.*  
149 *melanogaster* (S1 Table, Fig 1A). The aforementioned clade is well-supported in our phylogenetic analysis, with a  
150 bootstrap score of 76 on the divergent branch. This suggests that almost all insects (e.g. *D. melanogaster*, *Apis*  
151 *mellifera*) along with non-insect arthropods (e.g. mites and crustaceans such as *Tetranychus urticae* and *Daphnia*  
152 *magna*) are represented by one or more copies of *Oatp74D*. A notable exception are mosquitoes which have been  
153 previously shown to lack a gene of this clade but contain other ecdysone transporters in this gene family [26].  
154 However, none of the non-arthropod Ecdysozoa (e.g. *Hypsibius dujardini* (Tardigrada), *Priapulus caudatus*  
155 (Priapulida)) was represented in this clade. When considered at the species-level tree (Fig 1B), these data suggest  
156 that the evolution of *Oatp74D* appeared somewhere between the divergence of arthropods and priapulid worms  
157 such as *Priapulus caudatus*.

158  
159 **Fig 1. Evolution of Oatp74D in ecdysozoa.** (A) Rooted maximum likelihood phylogram constructed using the amino  
160 acid sequences of the OATP transporters from ecdysozoan species listed in S1 Table. The tree was rooted using the  
161 SLC2 transporter CAF0861090.1 from *R. sordida*. Leaf colors are based on the taxonomic classification of the species,  
162 whereas node colors indicate the bootstrap value range. The shaded area indicates the Oatp74D clade including the  
163 functionally characterized Ecl of *D. melanogaster* (arrow). Scale bar represents an evolutionary distance of 0.5 amino  
164 acid substitutions per site. GenBank accession numbers of the proteins used are shown in S1 Table. This tree is  
165 depicted with detailed bootstrap values in Figure S6. (B) A species level phylogeny using 1:1 orthologues among

166 species which sampled Ecdysozoa. The x-axis represents estimated divergence times of species in millions of years.  
167 Bootstrap support for branches is indicated in green circles at nodes. Greyscale labeling to the right of tip labels  
168 indicates clades such as hexapods (light grey), arthropods (dark grey), and ecdysozoa (black). Red boxes indicate the  
169 presence of OatP74D in a given species.

## 171 **2.2 *S. frugiperda* OATP74D is essential for larval development**

172 To assess whether OatP74D plays an essential role in lepidopteran development, a CRISPR/Cas9 strategy was  
173 employed in order to knock-out the *Oatp74D* of *S. frugiperda* in somatic tissues. Four different sgRNAs were used in  
174 order to ensure that a high mutation frequency was displayed at G0 mosaic insects (S1 Fig). As shown in Fig 2A and  
175 S4 Table, targeting *SfOatp74D* lead to a significantly lower hatching rate (10%) compared to eggs injected with  
176 sgRNAs targeting *SfScarlet* (38%). Furthermore, considering only hatched eggs, a lower proportion of *Oatp74D*  
177 injected larvae survived during larval development (25%) compared to the control larvae (86%; Fig 2B). PCR of the  
178 targeted region revealed several smaller bands appearing in the *OatP74D* injected larvae while only a single band  
179 was obtained from control animals (S1 Fig). This result and subsequent sequencing suggest that deletions of varying  
180 sizes were being mediated by the guide RNAs. The positive correlation between mutagenesis of *OatP74D* and  
181 lethality is highly suggestive of an essential role for this gene in *S. frugiperda*.

182  
183 **Fig 2. CRISPR mediated disruption of *S. frugiperda* *Oatp74D*.** (A) Lethal stages of *S. frugiperda* eggs injected with  
184 Cas9/sgRNA complexes targeting *Oatp74D* and *Scarlet* genes expressed as % of survivors and measured as hatching  
185 rate (left panel) and larval survival (right panel). Hatching rate and larval survival are expressed as hatched eggs and  
186 larval survivors normalized to total number of injected eggs, respectively. (B) Overall survival rates (as ratio of  
187 percentage of survivors against the total number of injected eggs) are illustrated for both *Oatp74D* and *Scarlet* genes.  
188 The size of each dot is proportional to the number of hatched eggs from each plate. Statistical significance was  
189 calculated by using un-paired t-test with Welch's correction (\*\* p<0.0079 and \*\*\*p<0.0003).

## 191 **2.3 *H. zea* OATP74D is necessary for initiation of ecdysone pathway**

192 The high mortality rates at the embryonic stages of *S. frugiperda* made further characterization of the role of  
193 lepidopteran OATP74D *in vivo* difficult. Therefore, the HzAW1 cell line was used to analyze the role of lepidopteran  
194 OATP74D in the ecdysone pathway. CRISPR-Cas9 was used to target the first exon of *HzOatp74D* and one clonal cell

195 line was generated harboring a 4-bp deletion in the first exon of the gene (S1C Fig). The elimination of these 4bp is  
196 predicted to lead to a truncated protein shortly after the start of translation.

### 197 **Knock-out of *HzOatp74D* inhibits differential expression of ecdysone responsive genes**

198 To address if the *HzOatp74D* is implicated in the ecdysone pathway for the regulation of gene expression cascades,  
199 four different ecdysone responsive genes were analyzed for their expression following treatment of both wild type  
200 and genome-modified HzAW1 cell lines with 1 $\mu$ M of 20-HE for four different time points. Among the four genes  
201 analyzed, three of them (*HzEcR*, *HzEip74A* and *HzEip75B*) showed a slight, yet statistically significant, differential  
202 expression between the wild type and the knock-out cell lines upon treatment with 1 $\mu$ M of 20-HE, at 9hrs and 12hrs  
203 of treatment (Fig 3A; S5 Table). *EcR* showed downregulation while *Eip74A* and *Eip75B* were enriched in the KO.  
204 Conversely, expression of the *Hr3* gene displayed a more pronounced difference between the HzAW1<sup>WT</sup> and the  
205 HzAW1 <sup>$\Delta$ OATP74D</sup> cells. Specifically, treatment of the wild type cells with 20-HE from 6hrs to 24hrs increased the  
206 expression of *Hr3* by approximately 9- to 17-folds, with respect to untreated cells, while under the same conditions  
207 in HzAW1 <sup>$\Delta$ OATP74D</sup> cells the gene was upregulated only by approximately 2-folds at all time points tested. Hence,  
208 *HzOatp74D* seems rather essential for the transcriptional regulation of ecdysone responsive genes.

209

210 **Fig 3. *HzOatp74D* is necessary for the initiation of ecdysone pathway.** (A) Differential expression analysis of ecdysone  
211 responsive genes (*HzEcR*, *HzEip74A*, *HzEip75B* and *HzHR3*) in HzAW1WT and HzAW1 $\Delta$ OATP74D cells after treatment  
212 with 1 $\mu$ M of 20-HE for 6hrs, 9hrs, 12hrs and 24hrs. Fold change expression was calculated as a ratio of the treated  
213 versus the untreated cells and expressed as mean of three to six biological replicates. Asterisks indicate statistical  
214 significance between the fold change of gene expression between the wild type and knock-out cells for each time  
215 point. (B) Flow cytometry analysis of FITC-Annexin V and propidium iodide (PI) stained cells after treatment of both  
216 Wild type and monoclonal knock-out cell lines with 5 $\mu$ M of 20-HE for 48hrs; Q1: Annexin-/PI- (live cells), Q2:  
217 Annexin+/PI- (early apoptotic cells), Q3: Annexin+/PI+ (late apoptotic cells), Q4: Annexin-/PI+ (dead cells). Flow  
218 cytometry plots represents one of the three biological replicates. (C) Fold Change Caspase-3 activity in HzAW1WT  
219 and HzAW1 $\Delta$ OATP74D cells at the same conditions as in B. AW1WT cells were also incubated in the presence of  
220 Caspase-3 inhibitor (Ac-DEVD-CHO) during the assay in order to exclude the non-specific cleavage of the synthetic  
221 tetrapeptide DEVD. (D) HzCaspase-3 expression analysis in both wild type and knock-out cell lines post treatment  
222 with 5 $\mu$ M of 20-HE for 48 hrs. Bars represent the mean  $\pm$  SE fold change gene expression of the treated versus  
223 untreated cells. Asterisks indicate statistically significant differences between the wild type and knock-out cell lines  
224 by un-paired t-test, For A: \*\*p=0.0025 and for A:\*p<0.0321, \*\*p<0.0046 and \*\*\*p<0.0002, ns: non-significant.

225



## 2.4 HzOatp74D is essential for regulating ecdysone-mediated cell death via caspase-3 activation

One of the physiological functions of the ecdysone pathway at the onset of metamorphosis is the induction of apoptotic cell death [1, 14]. To this end both wild type and knock-out cell lines were treated with 5 $\mu$ M of 20-HE for 48hrs and subsequently assessed for apoptosis using Annexin-PI staining. Treatment of wild type cells with 20-HE for 48hrs increased the percentage of early apoptotic cells (+ Annexin, - PI) by 2.9-folds compared to the untreated wild type cells (Fig 3B). In contrast, the percentage of early apoptotic HzAW1 $\Delta$ OATP74D cells was at identical levels with the respective negative control (untreated cells harboring the 4-bp deletion at *Oatp74D*).

Apoptotic cell death was further validated via relative quantification of active caspases using a fluorometric assay. As Fig 3C indicates, HzAW1<sup>WT</sup> exhibited a 5-fold increase of activated caspases upon treatment with 5 $\mu$ M of 20-HE for 48hrs, compared to the untreated wild type cells. However, the HzAW1 $\Delta$ OATP74D did not display any significant difference when treated with the hormone. Given that the ecdysone pathway regulates the expression of caspases in *D. melanogaster* directly through EcR [14], two different caspases were analyzed for their expression in the treated and untreated wild type and knock-out cells. Relative expression analysis of the two caspases (*caspase-3* and *caspase-8*) of *H. zea* indicated that 20-HE induced the expression of caspase-3 in the wild type cells by almost 3.7-fold compared to the untreated cells (Fig 3D). On the other hand, no difference was observed when HzAW1 $\Delta$ OATP74D cells were exposed to 20-HE, which further support the Annexin-PI staining and fluorometric assay results. *Caspase-8* was not differentially expressed upon treatment with 20-HE and no difference was observed between wild type and knock-out cell lines.

Taken together these results denote that HzOATP74D is necessary for 20-HE to induce differential expression of ecdysone target genes and apoptotic cell death in the midgut-derived cell line HzAW1.

## 2.5 *H. armigera* and *S. frugiperda* OATP74D are sufficient to rescue ecdysone induced gene transcription in HzAW1 $\Delta$ OATP74D

To analyze if other lepidopteran orthologs of the ecdysone importer are implicated in 20-HE uptake, a luciferase assay system was implemented similar to that reported previously for the *Drosophila Oatp74D* [24]. Prior to the overexpression of different OATP74D orthologs in cell lines, the assay was first performed with untransfected wild type and knock-out cells to check its robustness. The luciferase assay indicated that HzAW1<sup>WT</sup> exhibited a

253 significant proportionally increased luciferase activity upon treatment with 0.1 $\mu$ M and 1 $\mu$ M of 20-HE, almost by 3.6-  
254 fold and 6.6-fold respectively, compared to the untreated cells (S3B Fig, S4 Fig). On the contrary, treatment of the  
255 HzAW1 <sup>$\Delta$ OATP74D</sup> with the same concentrations of 20-HE did not induce any increase, keeping the levels of luciferase  
256 activity at the baseline (S3B Fig).

257 Therefore, the HzAW1 <sup>$\Delta$ OATP74D</sup> cell line was considered a useful tool for stable expression of other *Oatp74D*  
258 orthologs along with the ecdysone responsive firefly luciferase construct, in order to analyze their potency for  
259 responsiveness to the steroid hormone. To verify if *HaOatp74D* and *SfOatP74D* expression in the cells, both of them  
260 were tagged with a V5 epitope and checked for their expression at a protein level via western blot. As indicated in  
261 Fig 4b, lepidopteran OATP74Ds were expressed and identified at the predicted molecular weight, around ~75kDa.  
262 Furthermore, immunostaining of HzAW1 <sup>$\Delta$ OATP74D</sup> and Sf9 cells expressing *HaOatp74D-V5* and *SfOat74D-V5* indicated  
263 that both proteins are localized at the cellular membrane of the cells as delineated in the bright field overlay (Fig 4a,  
264 S3A Fig)

265 Over-expression of *DmOATP74D* was used as a positive control to test if luciferase activity would be induced  
266 upon treatment with different concentrations of 20-HE (Fig 4c). A 2.24 and 3.9-fold increase of luciferase activity was  
267 observed when cells were treated with 0.1 $\mu$ M and 1 $\mu$ M of the hormone respectively, compared to the untreated  
268 cells. Stable cells expressing HaOATP74D displayed a significant increase of luciferase activity by 1.7-fold and 2.54-  
269 fold, upon treatment with 0.1 $\mu$ M and 1 $\mu$ M of 20-HE respectively compared to the untreated cells (Fig 4c). Finally,  
270 treatment of stably expressing SfOATP74D cells with the same concentrations of 20-HE induced the expression of  
271 luciferase by 3.43 and 5.36-fold. Cells transfected with an empty vector did not display any difference upon  
272 treatment with 0.1 $\mu$ M and 1 $\mu$ M of 20-HE compared to the untreated cells.

273  
274 **Fig 4. SfOatp74D and HaOatp74D are sufficient to regulate ecdysone induced gene expression in cell cultures.** (A)  
275 Subcellular localization of SfOATP74D and HaOATP74D tagged with V5 epitope in transiently transfected HzAW1 cells.  
276 Blue indicates DAPI that counterstains nuclei, while Red indicates anti-V5, scale bar 20 $\mu$ M. (B) Western blot analysis  
277 of SfOATP74D-V5 and HaOATP74D-V5 in HzAW1 stable cell lines. Empty vector stable cells were used as negative  
278 control. Top panels represent blots HaOATP74D-V5 (left) and SfOATP74D-V5 (right) along with empty vector stably  
279 transfected cells using anti-V5. Bottom panel represent beta-tubulin used as loading control (~55kDa). (C) Schematic  
280 representation of luciferase assay in stable cell lines expressing OATP74D orthologs. (D) Analysis of ecdysone  
281 induced luciferase expression in stable cell lines over-expressing SfOatp74D, HaOatp74D, DmOatp74D and  
282 HaOatp74D-V5, upon treatment with 0.1 and 1 $\mu$ M of 20-HE for 24hrs. Values are calculated as ratio of Relative  
283 luminescence units (RLUs) against the total protein content. Asterisks indicate statistical significant differences

284 between cells overexpressing lepidoptera OATP74D against empty vector, \* $p=0.0149$ , \*\*\* $p=0.0004$ , \*\*\*\* $p<0.0001$ ,  
285 calculated with one-way ANOVA followed by post-hoc Dunnett test, ns: non-significant.

286

## 287 **2.6 Lepidoptera OATP74D are inhibited by known OATP Inhibitors**

288 Rifampicin and telmisartan, two well-known inhibitors of OATPs, were used in order to test whether  
289 OATP74D could be pharmacologically inhibited. Although telmisartan did not impact the function of any of the  
290 OATP74Ds (S3C Fig), rifampicin inhibited the ecdysone-induced luciferase activity when tested in stable cells treated  
291 with 0.1 $\mu$ M of 20-HE (Fig 5B). In particular, 10 $\mu$ M of rifampicin inhibited SfOATP74D by 30% but did not affect the  
292 activity of *Drosophila* and *Helicoverpa* proteins. Conversely, 50 $\mu$ M and 100 $\mu$ M of rifampicin lead to significant  
293 reductions of luciferase activity by >50% and >90% respectively, when tested against each of the OATP74D proteins  
294 (Fig 5B).

295

296 **Fig 5. Inhibition analysis of lepidoptera OATP74D by Rifampicin in stable cell lines.** (A) Schematic illustration of  
297 inhibition assay. (B) Box plot of luciferase assay values when the cell lines were incubated with 0.1 $\mu$ M of 20-HE in the  
298 presence of serial concentrations of Rifampicin (10 $\mu$ M, 50 $\mu$ M and 100 $\mu$ M) or DMSO (negative control). Each group is  
299 represented by eight different technical replicates. Asterisks indicate statistical significance between the different  
300 conditions tested versus cells treated only with 20-HE calculated with one-way ANOVA followed by post-hoc  
301 Dunnett's test, \* $p<0.048$ , \*\*\*\* $p<0.0001$ , ns: non-significant.

## 302 **3. Discussion**

### 303 **3.1 Phylogenetic analysis of the arthropod OATP protein subfamily**

304 Although the function and phylogeny of OATPs have been extensively studied in mammals, due to their  
305 pharmacological significance [27, 34, 51], there is limited information concerning non-mammalian species.  
306 Phylogenetic analysis of the OATP family in all orders of Ecdysozoa revealed that *Oatp74D* is well represented among  
307 arthropods, while non-arthropod species lack an *Oatp74D* ortholog (Fig 1). Our results are in agreement with  
308 previous phylogenetic analysis of this transporter [24] and provide a more detailed view of the presence of *Oatp74D*  
309 orthologs in various species of interest, including model species, disease vectors and agricultural pests. Interestingly,  
310 apart from identifying *Oatp74D* orthologs in *S. frugiperda* and *H. armigera*, it was found that mosquitoes do not have  
311 *Oatp74D* orthologs, although they belong to arthropods (Fig 1). In agreement with this result, a very recent study

reports the existence of additional ecdysone importers Ecl-2, Ecl-3 and Ecl-4 in *Aedes aegypti*, with Ecl-2 being necessary for development [26]. The fact that orthologs of the latter ecdysone transporters exist in *D. melanogaster*, but have no dominant role in development, exemplifies why further functional characterization of *Oatp74D* was needed to assess its essentiality in the two lepidopteran pests of our interest. Furthermore, the phylogenetic analysis suggested that non-arthropod species appear to have completely divergent clades of *Oatp* transporters which have yet to be characterized (Fig 1).

### 3.2 OATP74D is essential for lepidopteran insect development and survival

Partial disruption of *Oatp74D* in mosaic *S. frugiperda* embryos (Fig 2) had a severe impact on the egg hatching rate. This was not unexpected, since the ecdysone pathway is essential during embryogenesis, as indicated in *Drosophila melanogaster* embryos which seem to express the major biosynthetic enzymes of ecdysone and require EcR-USP nuclear receptors for normal development and survival [52, 53]. Heterologous expression of a dominant negative allele of EcR in a heterozygous mutant background for endogenous *EcR* increased the lethality as well as the penetrance of germ band retraction defects, indicating the necessity of the pathway overall in the development and morphogenesis of embryos [53]. Moreover, null mutant flies of other components of the ecdysone pathway like  $\beta$ FTZ-F1 and *DHR3* failed to hatch since they exhibited severe defects in ventral nerve cord condensation and an inability to fill their tracheal system with air [9]. Additional studies in lepidopteran species, like *Manduca sexta* and *Bombyx mori*, have documented the expression of ecdysteroidogenic enzymes during embryogenesis [1, 54]. Therefore, the reduced egg hatching rate caused by *SfOatp74D* disruption (Fig 4B) could be explained by its essential role in ecdysone transport. Similar results were observed when disruption of the organic anion transporter Ecl-2 of *Aedes aegypti* significantly reduced egg survival [26]. Interestingly, *DmOatp74D* null mutants did not exhibit any significant embryonic lethality, which contradicts with the increased embryonic lethality induced by knocking out *SfOatp74D* (Fig 4B) and *Ecl-2* of *Aedes aegypti* [24, 26]. This raises the question whether there is a different mechanism for cellular uptake of ecdysone in the *Drosophila* embryo or the phenotype is masked because of maternal deposition in the eggs of *Oatp74D* mRNA or protein.

High mortality observed in *SfOatP74D* injected individuals at larval stages (Fig 2B) further suggests an essential role for this gene in early larval development. This is in line with *DmOatp74D*, which seems to be essential for the development of larval stages since homozygous mutant flies arrested at L1 stage, failing to molt to the second larval instar [24]. Our results are also consistent with a previous study in *Tribolium castaneum*, in which

340 decreased larval survival and failure of pupation was observed upon silencing of *TcOATP4-C1*, a putative ortholog of  
341 the *Drosophila Oatp74D* [55]. Increased larval mortality was also observed in *Aedes aegypti* upon silencing of *Ecl-2*  
342 which induced 70-80% lethality [26]. It is noteworthy to mention that knock-out of other OATPs of *Drosophila* which  
343 were shown to mediate ecdysone uptake *in vitro*, did not impact animal development and survival, indicating the  
344 predominant role of *DmOatp74D* [26]. Taken together, *SfOatp74D* is essential for embryo hatching, larval molting  
345 and overall survival, although the existence of other lepidopteran OATPs functioning as ecdysone transporters  
346 cannot be ruled out.

### 348 **3.3 HzOatp74D is essential for the regulation of the canonical ecdysone pathway and the activation of** 349 **programmed cell death**

350 In parallel to *in vivo* work, an *in vitro* approach was taken by isolating a clonal cell line that is mutant for  
351 *Oatp74D*. Expression analysis suggested that *Oatp74D* is necessary for the transcriptional regulation of four different  
352 ecdysone-responsive genes, *HxECR*, *HZEIP74A*, *HZEIP75B* and *HZHR3*. Differential expression analysis of these genes  
353 between the wild type and knock-out cell lines upon treatment with the hormone (Fig 3A) highlighted the role of the  
354 *HZOatp74D* gene in the activation of the ecdysone pathway and are in agreement with other studies in which knock-  
355 out of *Oatp74D* affected the expression of ecdysone-responsive genes [24, 26].

356 It is well established that ecdysone is implicated in apoptotic cell death of larval tissues like the midgut and  
357 salivary glands during the larval to pupal transition [15, 56]. Previous studies have also indicated the role of certain  
358 G-protein coupled receptors (GPCRs) in the regulation of caspases' expression as a response to 20-HE induced  
359 apoptotic cell death (non-genomic function of ecdysone) [6, 13, 19, 56]. Certain caspases, like the *Drosophila dronc*,  
360 *reaper* and *hid* are upregulated at the onset of metamorphosis in tissues like the salivary glands and midgut as a  
361 response to the ecdysone pathway through direct binding of the EcR/USP transcriptional complex on the promoter  
362 region of these genes [14, 57]. However, the role of *OATP74D* remained unknown in cell death induced by the  
363 steroid hormone. Given the lethal phenotype of *S. frugiperda* OATP74D mutants from the early embryo stages, we  
364 decided to analyze the involvement of the OATP74D in cell death by using the cell line HzAW1, provided that the  
365 knock-out of the gene did not significantly affect the viability of the cells. Treatment of the knock-out and wild type  
366 cells with 20-HE indicated a clear difference in the number of early apoptotic cells as well as in the expression levels  
367 and activity of *caspase-3* (Fig 3C, 3D), indicating the necessity of the transporter in 20-HE-induced apoptosis. Several

368 studies have documented that the interplay between the genomic and the non-genomic pathway in *H. armigera* is  
369 mediated by GPCRs, which modulate gene transcription via regulating EcR and USP phosphorylation [13, 56, 58]. Our  
370 results also indicate that OATP74D function is necessary for the activation of the ecdysone pathway and the  
371 downstream physiological effects (e.g. triggering of apoptosis), in addition to the possible activation of the non-  
372 genomic pathway by 20-HE in the lepidopteran cells.

373 It must be considered that although the HzAW1 cell line is derived from the midgut tissue of *H. zea* [59], a  
374 substantial de-differentiation may have occurred [60], preventing the straightforward transfer of knowledge from *in*  
375 *vitro* to *in vivo*. Nevertheless, the role of OATP74D in the ecdysone pathway could still be resolved, given that  
376 regulatory genes of the pathway are expressed in these cells under physiological conditions [46]. A possible  
377 explanation to this could be that ecdysone is one of the most important signaling molecules that in very low doses  
378 can promote proliferation and growth in insect cultured cells, and therefore most insect cell lines maintain high  
379 levels of expression of the ecdysone-related genes [12, 62].

### 381 **3.4 SfOATP74D and HaOATP74D import ecdysone to regulate gene expression**

382 Indirect measurement of ecdysone importation was also accomplished using permanently transformed cell lines that  
383 express an ecdysone-responsive luciferase reporter assay together with OatP74D from different insect species.  
384 Removal of endogenous *OatP74D* decreased the ecdysone response while re-expression of any ortholog rescued  
385 ecdysone import (Fig 4D). To further characterize these transporters, rifampicin and telmisartan were tested for  
386 their efficiency to inhibit the function of lepidopteran OATP74D. Both compounds have been previously  
387 characterized to act as inhibitors of mammalian OATPs [63, 64, 65]. Although telmisartan had no impact on stable  
388 cells expressing OATP74D, rifampicin was shown to inhibit the ecdysone-induced luciferase expression when tested  
389 in cells overexpressing SfOATP74D and HaOATP74D, which is indicative that both function as typical OATPs  
390 mediating cellular uptake of 20-HE (Fig 5). To the best of our knowledge this is the first time that an ecdysone  
391 transporter was shown to be inhibited by a chemical compound, indicating its druggability.

392 Ecdysone-induced luciferase assays have been used extensively for the characterization of DmOATP74D as  
393 well as of other OATPs of both *Drosophila* and *Aedes* in other cell lines such as *Drosophila* S2 and mammalian  
394 HEK293 cells [24, 26]. In the case of S2 cells, overexpression of *DmOatp74D* did not exhibit large differences  
395 compared to the empty vector in the luciferase assay [24]. Similarly, we found only minor differences when wild type

396 HzAW1 cells were transfected with exogenous *OatP74D* (S4 Fig) suggesting that endogenous *OatP74D* was masking  
397 observable measurements [66, 67]. Previous studies performing the assay in mammalian HEK293 cells indicated a  
398 clear difference with the negative control given that mammals are void of ecdysone importers [24]. Using HEK293  
399 cells for this assay is more laborious since it requires at least the co-transfection of two major components of the  
400 ecdysone pathway, a modified version of the EcR and RXR [24]. It remains unclear which additional components of  
401 cell physiology from the relevant organism limit investigations. Thus, HzAW1<sup>ΔOATP74D</sup> cells have considerable  
402 advantages for the characterization of OATP74D orthologues possessing not only the nuclear receptors necessary for  
403 ecdysone response but also better resembling arthropod physiology.

404 In line with the essentiality of ecdysone transporters and their druggability as shown for rifampicin, it could  
405 be hypothesized that n OATP74D could be used as putative insecticide targets. Molting associated endocrine  
406 disruption is a known pest control principle, addressed by commercial EcR agonists such as methoxyfenozide which  
407 lead to precocious molting [68]. However, targeting OATP74D to block ecdysone signaling could indeed be  
408 promising, considering that membrane proteins are possibly more accessible to extracellular compounds compared  
409 to cytosolic or nuclear factors. The cell-based screening assay that was developed in this study may facilitate the  
410 identification of putative insecticide leads.

411

## 412 **Conclusion**

413 A very old enigma in steroid hormone uptake mechanism has been recently resolved in several case studies  
414 in *Drosophila* and mosquitoes. Even when the function of OATP74D in most insect species may be reasonably  
415 conserved, the existence of other ecdysone transporters cannot be ruled out even within the same species, as  
416 already shown in *Drosophila* [26]. Therefore, unraveling the role of OATPs in other insects' physiology will further  
417 enable understanding of the ecdysone uptake mechanisms. Our study provides useful information about the  
418 function of OATP74D in *H. armigera* and *S. frugiperda*, two highly destructive lepidopteran crop pests. The import of  
419 20-HE regulates the initiation of the canonical ecdysone pathway, with *SfOatp74D* being essential for insect survival.  
420 This is the first time reported that ecdysone transporters are inhibited by mammalian OATP inhibitors, providing  
421 excellent tools for future mechanistic studies. Finally, the HzAW1<sup>ΔOATP74D</sup> cell line developed in this study can be  
422 utilized as a platform for the heterologous expression of other ecdysone transporters for functional studies and  
423 screening purposes.

## 424 **4. Materials and Methods**

### 425 **4.1 Insects and cell lines**

426 *A Spodoptera frugiperda* population was obtained from Bayer CropScience and was maintained in the lab as  
427 a quarantine pest for several generations. The insects were reared at 24±1°C with a 16:8-hour photoperiod on a  
428 standard artificial food (based on corn flour).

429 Two different cell lines were used in this study in order to analyze the role of lepidopteran OATP74D in 20-  
430 HE transport. The Sf-9 cell line was obtained from Sigma and maintained as adherent culture in the insect serum free  
431 SF900 II SFM (Thermo Fisher Scientific) medium supplemented with 10% heat inactivated fetal bovine serum (FBS,  
432 GIBCO, Thermo Fisher Scientific) and 100U/ml of penicillin and 0.1mg/ml streptomycin. The *Helicoverpa zea* midgut  
433 cell line RP-HzGUT-AW1(MG) (referred hereafter as HzAW1) was a generous gift by Dr. Cynthia L. Goodman  
434 (Biological Control of Insects Research, U.S, Department of Agriculture, Agriculture Research Service). The cell line  
435 was routinely maintained as adherent culture in Excell 420 insect serum-free medium (Sigma Aldrich), supplemented  
436 with 10% heat-inactivated fetal bovine serum (FBS, GIBCO, Thermo Fisher Scientific) and 100U/ml of penicillin and  
437 0.1mg/ml streptomycin. Both cell lines were kept in a humidified incubator at 27°C.

### 438 **4.2 Phylogenetic analysis of OATP74D in arthropod species**

#### 440 **Construction of the OATP gene family tree**

441 The evolutionary history of *Oatp74D*-like genes was characterized by phylogenetic analysis using a  
442 representative subset of species from the Ecdysozoa taxonomic group (S1 Table). The reference gene annotations  
443 and proteomes of these species were downloaded from the National Center for Biotechnology Information (NCBI)  
444 and filtered in order to contain only the longest amino acid isoform per gene. Then, the *SLC\_id* pipeline [38] was  
445 applied on the filtered proteomes to select the OATP (SLCO aka SLC21) transporters of these species. Multiple  
446 sequence alignment was performed for the amino acid sequences of the identified OATPs and the outgroup *R.*  
447 *sordida* CAF0861090 SLC2 transporter (S1 Table) using Mafft v7.450 [33] under the default parameters. The  
448 outgroup was selected based on the classification of the Major Facilitator Superfamily (MFS) [34]. The produced  
449 alignments were automatically trimmed using TrimAl v1.4.rev22 -automated1- heuristic method [35]. Finally, the  
450 phylogenetic tree was built under the maximum likelihood optimality criterion by making use of RAxML-NG v. 0.9.0,



451 with the parameters `--bs-trees autoMRE{500}` for 500 bootstraps and `--model LG+G8+F` for model specification [36].  
452 The tree was visualized using the Ape package in R [37]. The orthogroup of *Oatp74D* was identified based on the  
453 functionally characterized orthologous gene from *D. melanogaster* [24].

454 Two paralogs of *Oatp74D* from *S. frugiperda*, LOC118271297 and LOC118278121, were identified in the  
455 *Oatp74D* clade. The aforementioned genes were manually inspected to assess if a gene duplication has taken place  
456 in the species. The assembly of *S. frugiperda* used in this analysis, GCF\_011064685.1, was compared to two different  
457 *S. frugiperda* assemblies, available in the NCBI under the accession numbers GCA\_012979215.2 and  
458 GCA\_019297735.1 and the latter was found to include only one copy of the gene. Thus, from the two *Oatp74D* genes  
459 identified in the phylogenetic analysis, only 118271297 was retained for the downstream analysis, having higher  
460 percentage of identity to the corresponding *Oatp74D* genes of the two other assemblies. The tree was reconstructed  
461 as described above, after excluding LOC118278121 from the multiple sequence alignment.

462 The gene level phylogeny was complemented by a species level phylogeny using representative species from  
463 Ecdysozoa (S1 Table) as performed previously [38]. Briefly, one-to-one orthologs were obtained using Orthofinder  
464 [39] with the filtered proteome files as inputs with default parameters. All orthologs from each orthogroup were  
465 aligned using Mafft and trimAl as in the gene level phylogeny [35, 40]. These alignments were then concatenated  
466 into a single alignment which was used as an input for maximum likelihood tree building with RAXML-NG v. 0.9.0 --  
467 `bs-trees autoMRE{200}` for 200 bootstraps and `--model LG+G8+F` for model specification. Visualization was  
468 accomplished using the ggtree package in R [41].

469

### 470 **4.3 Construct preparation**

#### 471 **Plasmids for transient OATP74D over-expression in insect cell lines**

472 The open reading frames of *SfOatp74D* (Gene ID: 118271297, 2109bp) and *DmOatp74D* (Gene ID: 39954, 2460bp)  
473 were PCR amplified using Phusion polymerase (NEB) from cDNA templates of 3<sup>rd</sup> instar larvae of *S. frugiperda* and  
474 adults of *D. melanogaster* respectively. The primer pairs used for PCR amplification were Sf-OATP74D-XbaI-F/Sf-  
475 OATP74D-NotI-R and Dm-OATP74D-XbaI-F/Dm-OATP74D-NotI-R (S2 Table), respectively. The PCR reactions for both  
476 genes were performed as follows: 98°C for 30sec initial denaturation, followed by 30cycles of 98°C for 10sec, 63°C  
477 for 30sec, 72°C for 1min10sec, followed by final extension at 72°C for 5min. Both PCR products were purified with a  
478 PCR clean-up kit (Macherey-Nagel) according to manufacturer's instructions. Both fragments were cloned into the

479 shuttle vector pGEM-T easy (Promega) and verified by Sanger sequencing. The *HaOatp74D* (2136bp) ORF was  
480 synthesized *de novo* (Genscript, Piscataway, NJ) based on the alignment of both NCBI reference sequence and the *de*  
481 *novo* transcriptome assembly of *H. armigera* [42]. The newly synthesized sequence was subcloned between the  
482 BamHI and NotI restriction sites of pFastBac1 vector. The *SfOatp74D* and *DmOatp74D* were finally cloned in between  
483 the XbaI and NotI sites of the lepidoptera specific expression vector pBmAc3 [43] while *HaOatp74D* was cloned  
484 between BamHI and NotI sites.

#### 485 **Plasmids for stable cell line generation**

486 The pEIA vector [49] was modified with the Gibson assembly methodology in order to replace the BmNPV-IE1 ORF  
487 with Puromycin N-acetyltransferase (PAC). The primers used to amplify the pEIA plasmid were pEIA-Fgibson and  
488 pEIA-Rgibson (S2 Table) and the PCR reaction was performed using Phusion polymerase (NEB). The ORF of the  
489 puromycin resistance gene was amplified using Phusion polymerase and pEA-PAC as a template and the primer pair  
490 used for the PCR reaction were PAC-Fgibson-Ascl/PAC-Rgibson-NcoI (S2 Table). Both primers introduce the  
491 restriction sites of the unicutters Ascl and NcoI to facilitate cloning of any other gene of interest downstream of the  
492 BmNPV-IE1 promoter. Both PCR products were used for constructing the final vector with Gibson assembly Master  
493 Mix (NEB), according to the instructions of the manufacturer. The final vector was verified by sequencing (Genewiz,  
494 Germany) and named as piE1:puro-BmAc3. To replace puromycin N-acetyltransferase with the Zeocin resistance  
495 gene (*Sh ble*), the pPICZa vector was digested with NcoI and EcoRV. The generated 439bp fragment was cloned into  
496 the vector piE1:puro-BmAc3 digested with Ascl, followed by treatment with Klenow fragment (Minotech) and  
497 subsequent digestion with NcoI. The ORF of *SfOatp74D*, *DmOatp74D* and *HaOatp74D* were cloned into the final  
498 vector (piE1:Zeocin-BmAc3) using the same strategy as used in the case of pBmAC3 vector.

499 To tag both *SfOatp74D* and *HaOatp74D* with a V5 epitope (GKPIPPLLGLDST) at the C-terminus of the protein, both  
500 ORFs were amplified with PCR using the primer pairs Sf-OATP74D-XbaI-F/Sf-OATP74D-BspEI-V5-NotI-R and Ha-  
501 OATP74D-BamHI-F/HaOATP74D-BspEI-R, respectively. The SfOATP74D insert was cloned in between XbaI and NotI  
502 sites of piE1:Zeocin-BmAc3 vector, harboring a BspEI restriction site upstream of the V5 epitope sequence. The  
503 *HaOatp74D-V5* PCR fragment was cloned between the BamHI and BspEI of the pBmAc3-SfOATP74D-V5 vector. A  
504 linker sequence (Gly-Ser-Gly) was used to separate the C-terminus of each of the two proteins with the V5 epitope.  
505 All plasmids generated in this study can be found in S3 Table.

506

#### 4.4 CRISPR mediated Knock-out of *Oatp74D* in *S. frugiperda*

In order to somatically disrupt the *Oatp74D* gene *in vivo*, CRISPR-Cas9 was performed by injecting *S. frugiperda* eggs according to a previously established protocol [44]. Briefly, egg batches were collected shortly after the onset of the scotoperiod and transferred to double sided tape using a whetted paintbrush [26]. Eggs were then injected under air-dry conditions with a solution containing 300ng/ $\mu$ l of recombinant Cas9 Nuclease (NEB) and 100ng/ $\mu$ l each of four sgRNAs targeting the first exon of the *Oatp74D* gene (S2 Table). Two days post-injection, wheat powder was sprinkled on top of the tape, which prevented the larvae from sticking once emerged. Survivorship and the number of days until pupation were measured across the lifespan of the emerging larvae. DNA samples obtained from healthy and weak larvae were sent for amplicon sequencing (GeneWiz) using primers flanking the four sgRNA cut sites (S2 Table). As a control for normalizing lethality due to technical handling during microinjections, *S. frugiperda* eggs were injected with sgRNAs targeting the *Scarlet* gene, which does not impact insect development and survival [45].

#### 4.5 CRISPR mediated knock-out of *Hzoatp74D* in HzAW1 cell line

A CRISPR-Cas9 strategy was employed to knock-out *Hzoatp74D* in the HzAW1 cell line. Several CRISPR targets were identified in the first exon of the gene based on the *de novo* transcriptome assembly of HzAW1 cell line [46], using the online version of the target finder chopchop [47]. Two different target sequences were selected displaying the minimal predicted off-target effects and the highest predicted efficiency. Single guide RNA sequences were annealed as single stranded oligos (S2 Table) and ligated into the CRISPR vector pBmAc3:Cac9-HaU6:1 [43] following digestion with BbsI.

The HzAW1 cell line was co-transfected with the two sgRNA expressing vectors and the pEA-PAC plasmid at a molecular ratio of 10:10:1. Specifically, one million cells were seeded in 6-well plates and co-transfected with 1 $\mu$ g of total DNA using the ESCORT IV transfection reagent (Sigma) following the instructions of the manufacturer. To positively select the transfected and possibly mutant cells, selection with 25 $\mu$ g/ml of puromycin was carried out for 10 days. Genotyping of the two generated cell lines was performed with PCR using primers flanking the targeted region (HzoATP74D-F-5UTR and HzoATP74D-R-exon1, S2 Table) yielding a fragment of 912bp corresponding to the wild type allele. PCR reactions were performed using Taq DNA polymerase (EnzyQuest, Greece) on genomic DNA extracted from both transfected cell lines with DNAzol reagent (Molecular Research Center); the conditions of the

535 PCR were as follows: 95°C for 3min initial denaturation, followed by 30cycles of 95°C for 30sec, 50°C for 30sec, 72°C  
536 for 30sec, followed by final extension at 72°C for 5min. The combination of sgRNAs yielded two distinct products  
537 corresponding to the wild type (912bp) and the mutated allele (~800bp) (S2B Fig). Each of the generated PCR  
538 fragments was purified and sequenced to validate the existence of mutated OATP74D isoforms.

539 Once the existence of mutated OATP74D alleles were verified by Sanger sequencing, single cell cloning was  
540 initiated to isolate a monoclonal line encompassing a unique isoform of mutated OATP74D gene. Limiting dilution  
541 method was employed in order to isolate clonal cell lines in a 96 well plate. From the 96 well plate, 16 wells were  
542 found to contain colonies of cells proliferating and only one of them were found to bear a single mutated OATP74D  
543 isoform. The monoclonal cell line was subsequently scaled up and used for downstream assays.

544

#### 545 **4.6 Expression analysis of Ecdysone responsive genes in HzAW1WT and HzAW1 $\Delta$ OATP74D**

546 The significance of OATP74D in ecdysone signaling of lepidoptera species was examined by analyzing the expression  
547 of four different ecdysone early response genes (NCBI GeneIDs: 110373773 (*HaHr3*), 110369974 (*HaEcR*), 110374646  
548 (*HaEip74A*), 110370041 (*HaEip75B*)) in the parental HzAW1 cell line bearing the wild type allele of *Oatp74D* and the  
549 monoclonal cell line bearing the mutated isoform of *Oatp74D* (referred hereafter as HzAW1<sup>WT</sup> and HzAW1 <sup>$\Delta$ Oatp74D</sup>  
550 respectively). Wild type and *HzOatp74D* knock-out cell lines were treated with either 1  $\mu$ M of 20-HE or the solvent  
551 (0.01% Ethanol) for four different time points (6, 9, 12 and 24 hrs). RNA was extracted from each group using Trizol  
552 reagent (MRC), according to the instructions of the manufacturer, combined with DNase treatment using the Turbo  
553 DNA free kit (Invitrogen). One  $\mu$ g of total RNA was used for first-strand complementary (cDNA) synthesis using  
554 specific primers with the Minotech RT kit (Minotech). qRT-PCR was performed on a CFX connect real-time PCR  
555 detection system (Bio-Rad) using the KAPA SYBR fast qPCR Master Mix kit (Kapa biosystems). The reactions were  
556 carried out using the following conditions: 95°C for 3min, followed by 40 cycles of 95°C for 10sec and 60°C for 45sec.  
557 All primers (S2 Table) were designed based on the *de novo* transcriptome assembly of the HzAW1 cell line [46]. The  
558 efficiency of PCR for each primer pair was assessed in 5-fold dilution series of pooled cDNA samples. The experiment  
559 was performed using three biological replicates and two technical replicates. Fold change expression was calculated  
560 as previously described [48]. Relative expression was normalized against the housekeeping genes *HzGadph* and  
561 *HzRps3a*. All primers that are used for the qRT-PCR experiments are summarized in the S2 Table. The fold change of

562 the relative expression data of qRT-PCR between the wild type and *Oatp74D* knock-out cell lines were analyzed for  
563 significance using un-paired t-test.

#### 565 **4.7 Analysis of ecdysone induced cell death in HzAW1 cell lines**

566 In order to assess the role of OATP74D in ecdysone-mediated cell death,  $4 \times 10^5$  cells of both HzAW1<sup>WT</sup> and  
567 HzAW1<sup>ΔOATP74D</sup> cells were seeded in 6 well plates and treated with 5μM of 20-HE for 48hrs. Each condition consisted  
568 of three biological replicates. The cells were harvested and  $10^5$  cells from each replicate were used for Fluorescence  
569 Activated Cell Sorting following staining with Annexin-PI (BD Pharmigen). The rest of the cells were used for protein  
570 and RNA extraction. Caspase-3 activity was calculated using the Caspase-3 assay kit (BD biosciences) following the  
571 instructions of the manufacturer. Furthermore, the Ac-DEVD-CHO (BD Biosciences) was used as a potent Caspase-3  
572 inhibitor to validate that fluorescence is mediated by caspase specifically and not by other serine proteases like  
573 cathepsins. Fluorescence was measured using the spectramax plate-reader with an excitation wavelength of 380nm  
574 and an emission wavelength range of 420-460nm (with 5nm increment). For each condition three biological and two  
575 technical replicates were used.

576 Extracted RNA from each sample was used for cDNA synthesis for qRT-PCR to analyze the expression of the genes  
577 *HzCaspase-3* and *HzCaspase-8* as previously described (NCBI Gene IDs: 110374006 (*HaCaspase-3*) and 110369675  
578 (*HaCaspase-8*)). Primer sequences used for both genes are shown in the S2 Table. Relative expression was  
579 normalized against *HzGadph* and *HzRps3a*.

580 Calculation of the proportion of apoptotic cells after treatment with 20-HE with Annexin-PI staining was conducted  
581 using FlowJo V10 software (BD, Lifesciences). All the results for fluorescence-based estimation of caspase-3 activity  
582 and the fold change relative expression of *HzCaspase-3* and *HzCaspase-8* were graphed and analyzed by unpaired t-  
583 test for individual comparisons between the treated and untreated cells, using the software GraphPad Prism 8.0.

#### 585 **4.8 Gene reporter assays**

##### 586 **Luciferase assay in Wild type and Knock-out HzAW1 cells**

587 To verify that OATP74D of *H. zea* acts as an ecdysone importer, an *in vitro* approach based on luciferase was  
588 employed. Specifically, the HzAW1<sup>WT</sup> and HzAW1<sup>ΔOatp74D</sup> cell lines were transfected with 1μg of the plasmid ERE-  
589 b.act.luc [50] in 6-well plates using ESCORT IV transfection reagent, following the instructions of the manufacturer.

590 Both cell lines were incubated for 72 hrs after transfection, after which 100µl of the transfected cells were seeded  
591 into 48-well plates and incubated for 2-3 hrs, followed by treatment with 0.1µM and 1µM of 20-HE (TCI chemicals,  
592 #1480). Twenty-four hours post treatment the cells were lysed and analyzed for luminescence using the Luciferase  
593 Assay system (Promega; Cat #E1500). Normalization among different technical replicates and conditions was carried  
594 out by normalizing the relative luminescence units (RLUs) against total protein content (calculated with the Bradford  
595 protein assay, BioRad). Each condition was measured in quadruplicates and each experiment was performed at least  
596 twice.

#### 597 **Luciferase assay in HzAW1<sup>ΔOatp74D</sup> stably overexpressing HaOATP74D and SfOATP74D**

598 For the OATP74D overexpression experiments, piE1:zeocinBmAc3-empty, piE1:zeocinBmAc3-*HaOatp74D*,  
599 piE1:zeocinBmAc3-*SfOatp74D*, or piE1:zeocinBmAc3-*DmOatp74D* were transfected along with ERE-b.act.luc plasmid  
600 in the HzAW1<sup>ΔOatp74D</sup> cell line. The *DmOatp74D* and empty vector were used as positive and negative control  
601 respectively. Three days later 200 µl of the transfected cells were seeded into new 6-well plates treated with 0.01%  
602 poly-L-Lysine (Sigma), followed by selection with 1mg/ml of Zeocin (Invitrogen). The medium was refreshed every 4  
603 days while selective concentration was reduced to 500µg/ml after 4 weeks of selection. Furthermore, a similar  
604 procedure was followed for the piE1:zeocinBmAc3-*HaOatp74D-V5* or piE1:zeocinBmAc3-*SfOatp74D-V5*, which both  
605 bear a V5 epitope tag at the C-terminus of the protein, in order to validate the expression of OATP74D in  
606 HzAW1<sup>ΔOatp74D</sup> cell line. Validation of *HaOatp74D* and *SfOatp74D* was performed with Western blot and  
607 immunofluorescence, as described below.

608 After propagating the cell lines of each genotype, the cells were tested for responsiveness to 20-HE with the  
609 luciferase assay, following the same procedure as previously described. Approximately 10<sup>5</sup> cells were seeded in 48-  
610 well plates coated with 0.01% poly-L-lysine (Sigma), followed by treatment with 20-HE overnight and were then  
611 tested for luciferase expression. Each condition was measured in eight independent technical replicates and each  
612 experiment was performed at least twice.

613

#### 614 **4.9 Western Blot and Immunofluorescence**

615 For western blots, cell lines stably over-expressing *HaOatp74D-V5* and *Sf-Oatp74D-V5* were harvested and lysed with  
616 RIPA lysis buffer (50mM Tris-HCl pH 8.0, 150mM NaCl, 0.5% Sodium-Deoxycolate, 0.1% SDS and 1% NP-40)  
617 supplemented with 1X cocktail Protease Inhibitors (Sigma-Aldrich) and 1mM PMSF, followed by centrifugation for

618 10min at 4°C at 6,000g. Protein concentration was measured with Bradford assay (BioRad). Approximately 30µg of  
619 total protein was loaded onto 10% SDS-PAGE and subsequently transferred to a nitrocellulose membrane. A mouse  
620 anti-V5 antibody (Cell signaling) was used at a dilution of 1:2500 in 1% milk dissolved in 1X TBST buffer for detection  
621 of either HaOATP74D-V5 or SfOATP74D-V5 proteins. Anti-beta tubulin (Santa-Cruz) was also used at a 1:1000  
622 dilution as loading control.

623 Cells over-expressing the epitope tagged lepidopteran OATP74D were used for immunostaining. Specifically cells  
624 were incubated on round shaped coverslips in 24-well plates. The cells were washed with 1X PBS and blocked for 1hr  
625 at room temperature with PBT solution, containing 2% BSA and 0.1% Triton-X100 in 1X PBS. The cells were incubated  
626 with 1:250 of primary antibody (mouse anti-V5) diluted in the blocking solution for overnight at 4°C. The cells were  
627 incubated with 1:1000 of anti-mouse secondary antibody conjugated with Alexa Fluor 555 for 1hr at room  
628 temperature. Nuclei were counterstained with DAPI and mounted with Vectashield Antifade mounting medium.  
629 Samples were observed using a Leica SP8 Inverted confocal microscope.

#### 630 **4.10 Cell based screening assay for inhibitors**

631 To analyze the potency of broad-spectrum inhibitors of organic anion transporters to inhibit the function of  
632 lepidopteran OATP74D, HzAW1<sup>ΔOATP74D</sup> cells stably overexpressing the lepidoptera OATP74D were pre-treated with  
633 several concentrations of telmisartan (Sigma-Aldrich) or rifampicin (Sigma-Aldrich) in the presence of 0.1µM 20-HE.  
634 Both inhibitors were tested at concentrations that do not impact cellular viability using the luciferase assay  
635 described above. Results were analyzed using the one-way ANOVA statistical test with Dunnet's multiple comparison  
636 test.

637

638

639

640

#### 641 **Acknowledgements**

642 The authors would like to thank Dr. Cynthia L. Goodman (Biological Control of Insects Research, U.S,  
643 Department of Agriculture, Agriculture Research Service) for providing the RP-Hz-GUT-AW1 cell line. Moreover. the  
644 authors thank Ioannis Livadaras for performing the injections in *S. frugiperda* eggs.

645

## 646 References

- 647 1. Yamanaka, N., Rewitz, K.F., and O'Connor, M.B. Ecdysone Control of Developmental Transitions: Lessons from  
648 *Drosophila* Research. *Annu. Rev. Entomol.* 2013; 58: 497–516. DOI: [10.1146/annurev-ento-120811-153608](https://doi.org/10.1146/annurev-ento-120811-153608)
- 649 2. Norman, A.W., Mizwicki, M.T., and Norman, D.P.G. Steroid-hormone rapid actions, membrane receptors and a  
650 conformational ensemble model. *Nat Rev Drug Discov.* 2004; 3, 27–41. DOI: [10.1038/nrd1283](https://doi.org/10.1038/nrd1283)
- 651 3. Sever, R., and Glass, C.K. Signaling by Nuclear Receptors. *Cold Spring Harbor Perspectives in Biology.* 2013; 5,  
652 a016709–a016709. DOI: [10.1101/cshperspect.a016709](https://doi.org/10.1101/cshperspect.a016709)
- 653 4. Lavrynenko, O., Rodenfels, J., Carvalho, M., Dye, N.A., Lafont, R., Eaton, S., and Shevchenko, A. The  
654 Ecdysteroidome of *Drosophila*: influence of diet and development. *Development.* 2015; dev.124982.  
655 DOI: [10.1242/dev.124982](https://doi.org/10.1242/dev.124982)
- 656 5. Ou Q, Zeng J, Yamanaka N, Brakken-Thal C, O'Connor MB, King-Jones K. The Insect Prothoracic Gland as a Model  
657 for Steroid Hormone Biosynthesis and Regulation. *Cell Reports.* 2016; 16:247–62. [10.1016/j.celrep.2016.05.053](https://doi.org/10.1016/j.celrep.2016.05.053)
- 658 6. Zhao, X.-F. (2020). G protein-coupled receptors function as cell membrane receptors for the steroid hormone  
659 20-hydroxyecdysone. *Cell Commun Signal.* 2020; 18, 146. DOI: [10.12669/pjms.38.1.4396](https://doi.org/10.12669/pjms.38.1.4396)
- 660 7. Truman, J.W. The Evolution of Insect Metamorphosis. *Current Biology.* 2019; 29, R1252–R1268.  
661 DOI: [10.1016/j.cub.2019.10.009](https://doi.org/10.1016/j.cub.2019.10.009)
- 662 8. Broadus, J., McCabe, J.R., Endrizzi, B., Thummel, C.S., and Woodard, C.T. The *Drosophila*  $\beta$ FTZ-F1 Orphan  
663 Nuclear Receptor Provides Competence for Stage-Specific Responses to the Steroid Hormone Ecdysone.  
664 *Molecular Cell* 7. 1999; 3, 143-149. DOI: [10.1016/s1097-2765\(00\)80305-6](https://doi.org/10.1016/s1097-2765(00)80305-6)
- 665 9. Ruaud, A.-F., Lam, G., and Thummel, C.S. The *Drosophila* nuclear receptors DHR3 and  $\beta$ FTZ-F1 control  
666 overlapping developmental responses in late embryos. *Development.* 2010; 137, 123–131.  
667 doi: [10.1242/dev.042036](https://doi.org/10.1242/dev.042036)
- 668 10. King-Jones, K., and Thummel, C.S. Nuclear receptors — a perspective from *Drosophila*. *Nat Rev Genet.* 2005; 6,  
669 311–323. DOI: [10.1038/nrg1581](https://doi.org/10.1038/nrg1581)



- 670 11. Ninov N, Manjón C, Martvñ-Blanco E. Dynamic Control of Cell Cycle and Growth Coupling by Ecdysone, EGFR,  
671 and PI3K Signaling in *Drosophila* Histoblasts. O'Farrell PH, editor. *PLoS Biol.* 2009 Apr 7;7(4):e1000079. DOI:  
672 [10.1371/journal.pbio.1000079](https://doi.org/10.1371/journal.pbio.1000079)
- 673 12. Nijhout, H.F., and Callier, V. Developmental Mechanisms of Body Size and Wing-Body Scaling in Insects. *Annu.*  
674 *Rev. Entomol.* 2015; 60, 141–156. DOI: [10.1146/annurev-ento-010814-020841](https://doi.org/10.1146/annurev-ento-010814-020841)
- 675 13. Chen, C.-H., Pan, J., Di, Y.-Q., Liu, W., Hou, L., Wang, J.-X., and Zhao, X.-F. Protein kinase C delta phosphorylates  
676 ecdysone receptor B1 to promote gene expression and apoptosis under 20-hydroxyecdysone regulation. *Proc*  
677 *Natl Acad Sci USA.* 2017; 114, E7121–E7130. DOI: [10.1073/pnas.1704999114](https://doi.org/10.1073/pnas.1704999114)
- 678 14. Cakouros, D., Daish, T.J., and Kumar, S. Ecdysone receptor directly binds the promoter of the *Drosophila* caspase  
679 *dronc*, regulating its expression in specific tissues. *Journal of Cell Biology.* 2004; 165, 631–  
680 640. DOI: [10.1083/jcb.200311057](https://doi.org/10.1083/jcb.200311057)
- 681 15. Zirin, J., Cheng, D., Dhanyasi, N., Cho, J., Dura, J.-M., VijayRaghavan, K., and Perrimon, N. Ecdysone signaling at  
682 metamorphosis triggers apoptosis of *Drosophila* abdominal muscles. *Developmental Biology.* 2013; 383, 275–  
683 284. doi: [10.1016/j.ydbio.2013.08.029](https://doi.org/10.1016/j.ydbio.2013.08.029)
- 684 16. Romanelli, D., Casartelli, M., Cappellozza, S., de Eguileor, M., and Tettamanti, G. Roles and regulation of  
685 autophagy and apoptosis in the remodelling of the lepidopteran midgut epithelium during metamorphosis. *Sci*  
686 *Rep.* 2016; 6, 32939. DOI: [10.1038/srep32939](https://doi.org/10.1038/srep32939)
- 687 17. Tettamanti, G., and Casartelli, M. Cell death during complete metamorphosis. *Phil. Trans. R. Soc. B.* 2019; 374,  
688 20190065. DOI: [10.1098/rstb.2019.0065](https://doi.org/10.1098/rstb.2019.0065)
- 689 18. Xu, T., Jiang, X., Denton, D., and Kumar, S. Ecdysone controlled cell and tissue deletion. *Cell Death Differ.* 2020;  
690 27, 1–14. DOI: [10.1038/s41418-019-0456-9](https://doi.org/10.1038/s41418-019-0456-9)
- 691 19. Li, Y.-B., Yang, T., Wang, J.-X., and Zhao, X.-F. The Steroid Hormone 20-Hydroxyecdysone Regulates the  
692 Conjugation of Autophagy-Related Proteins 12 and 5 in a Concentration and Time-Dependent Manner to  
693 Promote Insect Midgut Programmed Cell Death. *Front. Endocrinol.* 2018; 9,  
694 28. DOI: [10.3389/fendo.2018.00028](https://doi.org/10.3389/fendo.2018.00028)

- 695 20. Giraudo, M., Califano, J., Hilliou, F., Tran, T., Taquet, N., Feyereisen, R., and Le Goff, G. Effects of Hormone  
696 Agonists on Sf9 Cells, Proliferation and Cell Cycle Arrest. PLoS ONE. 2011; 6, e25708.  
697 <https://doi.org/10.1371/journal.pone.0025708>.
- 698 21. Hock T, Cottrill T, Keegan J, Garza D. The *E23* early gene of *Drosophila* encodes an ecdysone-inducible ATP-  
699 binding cassette transporter capable of repressing ecdysone-mediated gene activation. Proc Natl Acad Sci USA.  
700 2000 Aug 15;97(17):9519–24.
- 701 22. Yamanaka, N., Marquis, G., and O'Connor, M.B. Vesicle-Mediated Steroid Hormone Secretion in *Drosophila*  
702 melanogaster. Cell. 2015; 163, 907–919. DOI: [10.1016/j.cell.2015.10.022](https://doi.org/10.1016/j.cell.2015.10.022)
- 703 23. Neuman SD, Bashirullah A. Reconsidering the Passive Diffusion Model of Steroid Hormone Cellular Entry.  
704 Developmental Cell. 2018 Nov;47(3):261–2. DOI: [10.1016/j.devcel.2018.10.022](https://doi.org/10.1016/j.devcel.2018.10.022)
- 705 24. Okamoto N, Viswanatha R, Bittar R, Li Z, Haga-Yamanaka S, Perrimon N, et al. A Membrane Transporter Is  
706 Required for Steroid Hormone Uptake in *Drosophila*. Developmental Cell. 2018 Nov;47(3):294-305.e7.  
707 DOI: [10.1016/j.devcel.2018.09.012](https://doi.org/10.1016/j.devcel.2018.09.012)
- 708 25. Okamoto N, Yamanaka N. Steroid Hormone Entry into the Brain Requires a Membrane Transporter in  
709 *Drosophila*. Current Biology. 2020 Jan;30(2):359-366.e3. DOI: [10.1016/j.cub.2019.11.085](https://doi.org/10.1016/j.cub.2019.11.085)
- 710 26. Hun, L.V., Okamoto, N., Imura, E., Maxson, R., Bittar, R., and Yamanaka, N. Essential functions of mosquito  
711 ecdysone importers in development and reproduction. Biorxiv. 2021;  
712 <https://doi.org/10.1101/2021.09.10.459809>
- 713 27. Hagenbuch, B., and Stieger, B. The SLCO (former SLCO) superfamily of transporters. Molecular Aspects of  
714 Medicine. 2013; 34, 396–412. DOI: [10.1016/j.mam.2012.10.009](https://doi.org/10.1016/j.mam.2012.10.009)
- 715 28. Stieger, B., and Hagenbuch, B. Organic Anion-Transporting Polypeptides. In Current Topics in Membranes,  
716 (Elsevier). 2014; 205–232. DOI: [10.1016/B978-0-12-800223-0.00005-0](https://doi.org/10.1016/B978-0-12-800223-0.00005-0)

- 717 29. Schäfer, A.M., Meyer zu Schwabedissen, H.E., and Grube, M. Expression and Function of Organic Anion  
718 Transporting Polypeptides in the Human Brain: Physiological and Pharmacological Implications. *Pharmaceutics*.  
719 2021; 13, 834. DOI: [10.3390/pharmaceutics13060834](https://doi.org/10.3390/pharmaceutics13060834)
- 720 30. Sparks, A.N. A review of the biology of the fall armyworm. *Fla. Entomol.* 1979; 62,82e87  
721 <http://dx.doi.org/10.2307/3494083>
- 722 31. Haile, F., Nowatzki, T., and Storer, N. Overview of Pest Status, Potential Risk, and Management Considerations  
723 of *Helicoverpa armigera* (Lepidoptera: Noctuidae) for U.S. Soybean Production. *Journal of Integrated Pest*  
724 *Management*. 2021; 12, 3. <https://doi.org/10.1093/jipm/pmaa030>
- 725 32. Paredes-Sánchez, F.A., Rivera, G., Bocanegra-García, V., Martínez-Padrón, H.Y., Berrones-Morales, M., Niño-  
726 García, N., Herrera-Mayorga, V. Advances in Control Strategies against *Spodoptera frugiperda*. A Review.  
727 *Molecules*. 2021; 26, 5587. <https://doi.org/10.3390/molecules26185587>
- 728 33. Kazutaka Katoh, Daron M. Standley. MAFFT Multiple Sequence Alignment Software Version 7: Improvements in  
729 Performance and Usability. *Molecular Biology and Evolution*. 2013; 30(4), 772–  
730 780. <https://doi.org/10.1093/molbev/mst010>
- 731 34. Høglund, P.J., Nordstrom, K.J.V., Schiøth, H.B., and Fredriksson, R. The Solute Carrier Families Have a  
732 Remarkably Long Evolutionary History with the Majority of the Human Families Present before Divergence of  
733 Bilaterian Species. *Molecular Biology and Evolution*. 2011; 28, 1531–1541. DOI: [10.1093/molbev/msq350](https://doi.org/10.1093/molbev/msq350)
- 734 35. Capella-Gutierrez, S., Silla-Martinez, J.M., and Gabaldon, T. trimAl: a tool for automated alignment trimming in  
735 large-scale phylogenetic analyses. *Bioinformatics*. 2009; 25, 1972–1973. DOI: [10.1093/bioinformatics/btp348](https://doi.org/10.1093/bioinformatics/btp348)
- 736 36. Kozlov, A.M., Darriba, D., Flouri, T., Morel, B., and Stamatakis, A. RAXML-NG: a fast, scalable and user-friendly  
737 tool for maximum likelihood phylogenetic inference. *Bioinformatics*. 2019; 35, 4453–4455  
738 DOI: [10.1093/bioinformatics/btz305](https://doi.org/10.1093/bioinformatics/btz305)
- 739 37. Paradis, E., Claude, J., and Strimmer, K. APE: Analyses of Phylogenetics and Evolution in R language.  
740 *Bioinformatics*. 2004; 20, 289–290. <https://doi.org/10.1093/bioinformatics/btg412>

- 741 38. Denecke, S.M., Driva, O., Luong, H.N.B., Ioannidis, P., Linka, M., Nauen, R., Geibel, S., and Vontas, J. The  
742 Identification and Evolutionary Trends of the Solute Carrier Superfamily in Arthropods. *Genome Biology and*  
743 *Evolution*. 2020; 12, 1429–1439. DOI: [10.1093/gbe/evaa153](https://doi.org/10.1093/gbe/evaa153)
- 744 39. Emms, D.M., Kelly, S. OrthoFinder: phylogenetic orthology inference for comparative genomics. *Genome Biol.*  
745 2019; 20, 238. <https://doi.org/10.1186/s13059-019-1832-y>
- 746 40. Katoh, K., and Standley, D.M. MAFFT Multiple Sequence Alignment Software Version 7: Improvements in  
747 Performance and Usability. *Molecular Biology and Evolution*. 2013 30, 772–780. DOI: [10.1093/molbev/mst010](https://doi.org/10.1093/molbev/mst010)
- 748 41. Yu G, Smith DK, Zhu H, Guan Y, Lam TT. GGTREE : an R package for visualization and annotation of phylogenetic  
749 trees with their covariates and other associated data. McInerney G, editor. *Methods Ecol Evol*. 2017 Jan;8(1):28–  
750 36. doi: [10.1111/2041-210X.12628](https://doi.org/10.1111/2041-210X.12628)
- 751 42. Ioannidis P, Buer B, Ilias A, Kaforou S, Aivaliotis M, Orfanoudaki G, Douris V, Geibel S, Vontas J, Denecke S. A  
752 spatiotemporal atlas of the lepidopteran pest *Helicoverpa armigera* midgut provides insights into nutrient  
753 processing and pH regulation. *BMC Genomics*.2022; 23(1):75. doi: [10.1186/s12864-021-08274-x](https://doi.org/10.1186/s12864-021-08274-x).
- 754 43. Samantsidis GR, Denecke S, Swevers L, Skavdis G, Geibel S, Vontas J. Identification of *Helicoverpa armigera*  
755 promoters for biotechnological applications. *Insect Biochem Mol Biol*. 2022; 27:103725. doi:  
756 [10.1016/j.ibmb.2022.103725](https://doi.org/10.1016/j.ibmb.2022.103725).
- 757 44. Zhu, G.-H., Chereddy, S.C.R.R., Howell, J.L., and Palli, S.R. (2020). Genome editing in the fall armyworm,  
758 *Spodoptera frugiperda*: Multiple sgRNA/Cas9 method for identification of knockouts in one generation. *Insect*  
759 *Biochem Mol Biol*. 2020; 122, 103373. DOI: [10.1016/j.ibmb.2020.103373](https://doi.org/10.1016/j.ibmb.2020.103373)
- 760 45. Khan, S.A., Reichelt, M., and Heckel, D.G. Functional analysis of the ABCs of eye color in *Helicoverpa armigera*  
761 with CRISPR/Cas9-induced mutations. *Sci Rep*. 2017; 7, 40025. DOI: [10.1038/srep40025](https://doi.org/10.1038/srep40025)
- 762 46. Vorgia, E., Lamprousi, M., Denecke, S., Vogelsang, K., Geibel, S., Vontas, J., and Douris, V. (2021). Functional  
763 characterization and transcriptomic profiling of a spheroid-forming midgut cell line from *Helicoverpa zea*  
764 (Lepidoptera: Noctuidae). *Insect Biochem Mol Biol*. 2021; 128, 103510. DOI: [10.1016/j.ibmb.2020.103510](https://doi.org/10.1016/j.ibmb.2020.103510)

- 765 47. Labun, K., Montague, T.G., Krause, M., Torres Cleuren, Y.N., Tjeldnes, H., and Valen, E. CHOPCHOP v3:  
766 expanding the CRISPR web toolbox beyond genome editing. *Nucleic Acids Research*. 2019; 47, W171–W174.  
767 DOI: [10.1093/nar/gkz365](https://doi.org/10.1093/nar/gkz365)
- 768 48. Pfaffl, M.W. A new mathematical model for relative quantification in real-time RT-PCR. *Nucleic Acids Research*.  
769 2001; 29, 45e–445. DOI: [10.1093/nar/29.9.e45](https://doi.org/10.1093/nar/29.9.e45)
- 770 49. Douris V, Swevers L, Labropoulou V, Andronopoulou E, Georgoussi Z, Iatrou K. Stably Transformed Insect Cell  
771 Lines: Tools for Expression of Secreted and Membrane-anchored Proteins and High-throughput Screening  
772 Platforms for Drug and Insecticide Discovery. In: *Advances in Virus Research* [Internet]. Elsevier; 2006; 113–56.  
773 Available from: <https://linkinghub.elsevier.com/retrieve/pii/S0065352706680044>
- 774 50. Soin, T., Swevers, L., Mosallanejad, H., Efroze, R., Labropoulou, V., Iatrou, K., and Smagghe, G. Juvenile hormone  
775 analogs do not affect directly the activity of the ecdysteroid receptor complex in insect culture cell lines. *Journal*  
776 *of Insect Physiology*. 2008; 54, 429–438. DOI: [10.1016/j.jinsphys.2007.11.001](https://doi.org/10.1016/j.jinsphys.2007.11.001)
- 777 51. Fenner, K.S., Jones, H.M., Ullah, M., Kempshall, S., Dickins, M., Lai, Y., Morgan, P., and Barton, H.A. The  
778 evolution of the OATP hepatic uptake transport protein family in DMPK sciences: from obscure liver  
779 transporters to key determinants of hepatobiliary clearance. *Xenobiotica*. 2012; 42, 28–45.  
780 DOI: [10.3109/00498254.2011.626464](https://doi.org/10.3109/00498254.2011.626464)
- 781 52. Chávez, V.M., Marques, G., Delbecque, J.P., Kobayashi, K., Hollingsworth, M., Burr, J., Natzle, J.E., O'Connor, M.  
782 The *Drosophila* disembodied gene controls late embryonic morphogenesis and codes for a cytochrome P450  
783 enzyme that regulates embryonic ecdysone levels. *Development*. 2000; 127, 4115–4126.  
784 DOI: [10.1242/dev.127.19.4115](https://doi.org/10.1242/dev.127.19.4115)
- 785 53. Kozlova, T., and Thummel, C.S. Essential Roles for Ecdysone Signaling During *Drosophila* Mid-Embryonic  
786 Development. *Science*. 2003; 301, 1911–1914. DOI: [10.1126/science.1087419](https://doi.org/10.1126/science.1087419)
- 787 54. Sonobe, H., and Yamada, R. Ecdysteroids during Early Embryonic Development in Silkworm *Bombyx mori*:  
788 Metabolism and Functions. *Zoological Science*. 2004; 21, 503–516. DOI: [10.2108/zsj.21.503](https://doi.org/10.2108/zsj.21.503)

- 789 55. Rosner, J., Tietmeyer, K., Merzendorfer, H. Organic anion-transporting polypeptides are involved in the  
790 elimination of insecticides from the red flour beetle, *Tribolium castaneum*. *J. Pest Sci.* 2021; 94, 1427-1437. doi:  
791 <https://doi.org/10.1007/s10340-020-01317-4>
- 792 56. Kang, X.-L., Zhang, J.-Y., Wang, D., Zhao, Y.-M., Han, X.-L., Wang, J.-X., and Zhao, X.-F. The steroid hormone 20-  
793 hydroxyecdysone binds to dopamine receptor to repress lepidopteran insect feeding and promote pupation.  
794 *PLoS Genet.* 2019; 15, e1008331. DOI: [10.1371/journal.pgen.1008331](https://doi.org/10.1371/journal.pgen.1008331)
- 795 57. Jiang, C., Lamblin, A.-F.J., Steller, H., and Thummel, C.S. A Steroid-Triggered Transcriptional Hierarchy Controls  
796 Salivary Gland Cell Death during *Drosophila* Metamorphosis. *Molecular Cell.* 2000; 5, 445–455.  
797 DOI: [10.1016/s1097-2765\(00\)80439-6](https://doi.org/10.1016/s1097-2765(00)80439-6)
- 798 58. Wang, D., Zhao, W.-L., Cai, M.-J., Wang, J.-X., and Zhao, X.-F. G-protein-coupled receptor controls steroid  
799 hormone signaling in cell membrane. *Sci Rep.* 2015; 5, 8675. DOI: [10.1038/srep08675](https://doi.org/10.1038/srep08675)
- 800 59. Goodman, C.L., Wang, A.A., Nabli, H., Mcintosh, A.H., Wittmeyer, J.L., Grasela, J.J. Development and partial  
801 characterization of heliothine cell lines from embryonic and differentiated tissues. *Vitro Anim. Cell Dev. Biol.*  
802 2004; 40(3), 89. [https://doi.org/10.1290/1543-706x\(2004\)040<0089:dapcoh>2.0.co;2](https://doi.org/10.1290/1543-706x(2004)040<0089:dapcoh>2.0.co;2).
- 803 60. Swevers, L., Denecke, S., Vogelsang, K., Geibel, S., and Vontas, J. Can the mammalian organoid technology be  
804 applied to the insect gut? *Pest Manag Sci.* 2021; 77, 55–63.
- 805 61. Fallon, A.M., and Gerenday, A. Ecdysone and the cell cycle: Investigations in a mosquito cell line. *Journal of*  
806 *Insect Physiology.* 2010; 56, 1396–1401. DOI: [10.1016/j.jinsphys.2010.03.016](https://doi.org/10.1016/j.jinsphys.2010.03.016)
- 807 62. Nijhout, H.F., Riddiford, L.M., Mirth, C., Shingleton, A.W., Suzuki, Y., and Callier, V. The developmental control of  
808 size in insects: Developmental control of size in insects. *WIREs Dev Biol.* 2014; 3, 113–134.  
809 DOI: [10.1002/wdev.124](https://doi.org/10.1002/wdev.124)
- 810 63. Patik, I., Kovacsics, D., Németh, O., Gera, M., Várady, G., Stieger, B., Hagenbuch, B., Szakács, G., and Özvegy-  
811 Laczka, C. Functional expression of the 11 human Organic Anion Transporting Polypeptides in insect cells reveals  
812 that sodium fluorescein is a general OATP substrate. *Biochemical Pharmacology.* 2015; 98, 649–658.  
813 DOI: [10.1016/j.bcp.2015.09.015](https://doi.org/10.1016/j.bcp.2015.09.015)

- 814 64. Dolberg, A.M., and Reichl, S. Expression analysis of human solute carrier (SLC) family transporters in nasal  
815 mucosa and RPMI 2650 cells. *European Journal of Pharmaceutical Sciences*. 2018; 123, 277–294.  
816 DOI: [10.1016/j.ejps.2018.07.040](https://doi.org/10.1016/j.ejps.2018.07.040)
- 817 65. Li, X., Guo, Z., Wang, Y., Chen, X., Liu, J., and Zhong, D. Potential role of organic anion transporting polypeptide  
818 1B1 (OATP1B1) in the selective hepatic uptake of hematoporphyrin monomethyl ether isomers. *Acta Pharmacol*  
819 *Sin*. 2015; 36, 268–280 DOI: [10.1038/aps.2014.104](https://doi.org/10.1038/aps.2014.104)
- 820 66. Fu, Y., Yang, Y., Zhang, H., Farley, G., Wang, J., Quarles, K.A., Weng, Z., and Zamore, P.D. The genome of the Hi5  
821 germ cell line from *Trichoplusia ni*, an agricultural pest and novel model for small RNA biology. 2018; *ELife* 7,  
822 e31628. doi: [10.7554/eLife.31628](https://doi.org/10.7554/eLife.31628)
- 823 67. Shu, B., Zhang, J., Sethuraman, V., Cui, G., Yi, X., and Zhong, G. Transcriptome analysis of *Spodoptera frugiperda*  
824 Sf9 cells reveals putative apoptosis-related genes and a preliminary apoptosis mechanism induced by  
825 azadirachtin. *Sci Rep*. 2017; 7, 13231. DOI: [10.1038/s41598-017-12713-9](https://doi.org/10.1038/s41598-017-12713-9)
- 826 68. Song, Y., Villeneuve, D.L., Toyota, K., Iguchi, T., and Tollefsen, K.E. Ecdysone Receptor Agonism Leading to Lethal  
827 Molting Disruption in Arthropods: Review and Adverse Outcome Pathway Development. *Environ. Sci. Technol.*  
828 2017; 51, 4142–4157 doi: [10.1021/acs.est.7b00480](https://doi.org/10.1021/acs.est.7b00480)

829

830

831

832

833

834

835

836 **Fig 1**

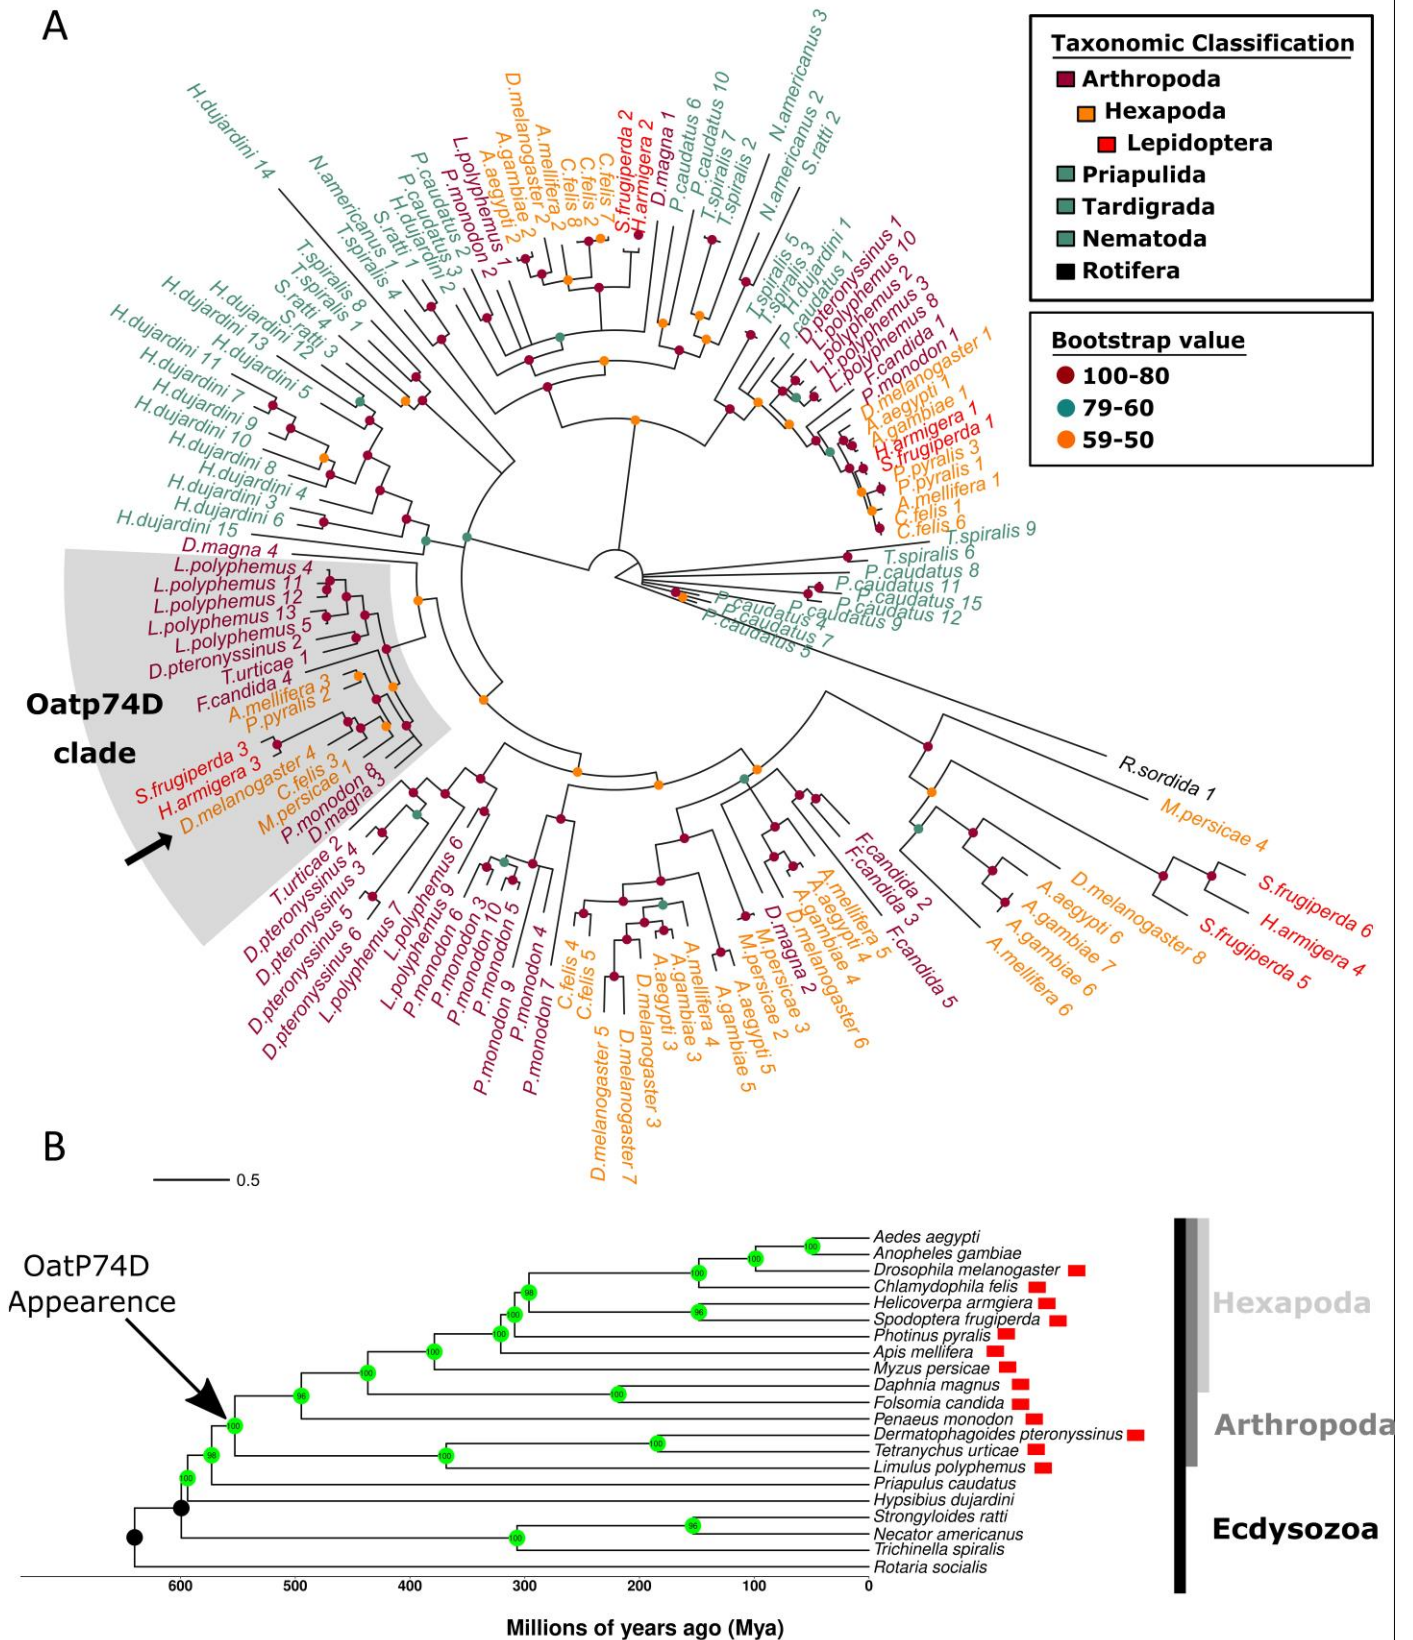

Fig 2



A

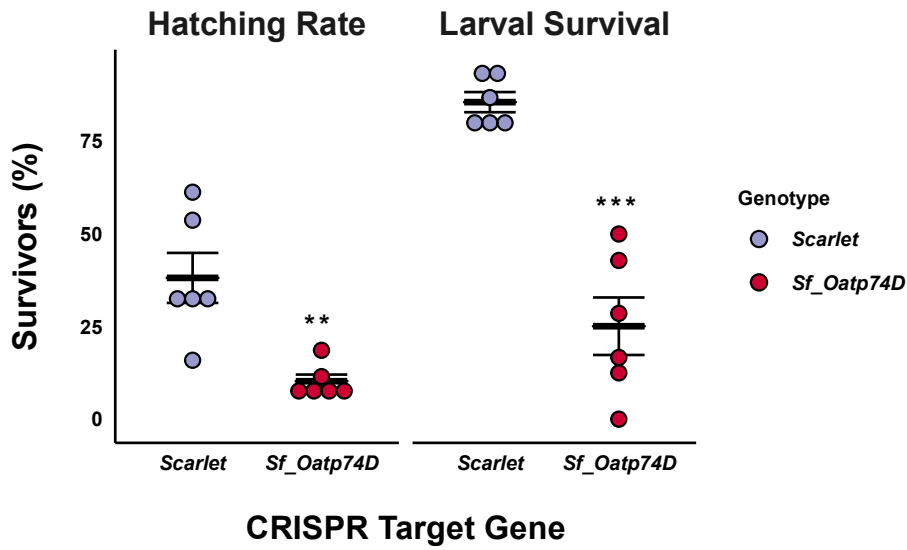

B

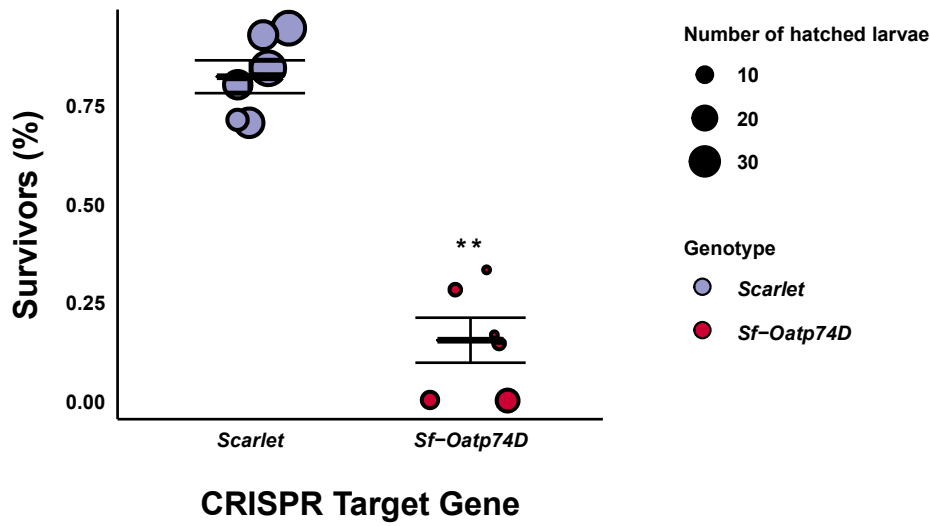

843

844

845

846

847

848

849

850

851

852

853 Fig. 3

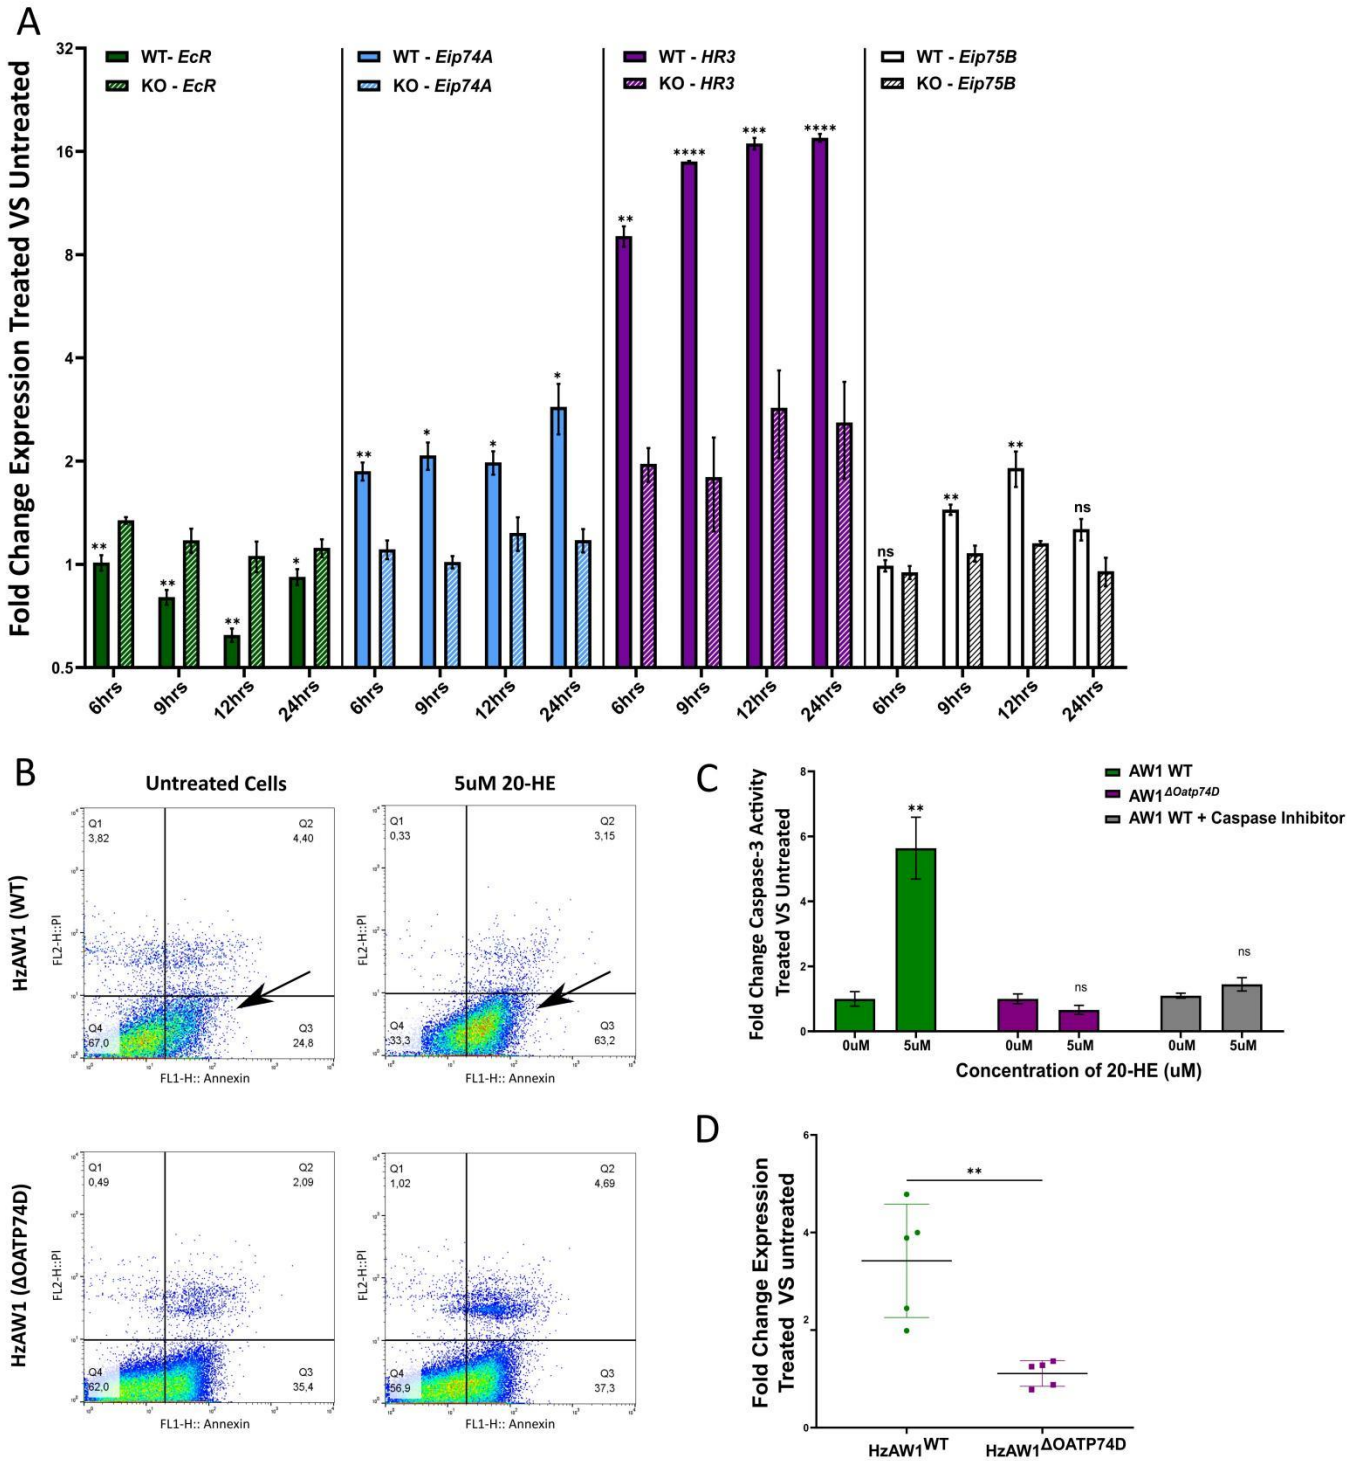

Fig. 4

862

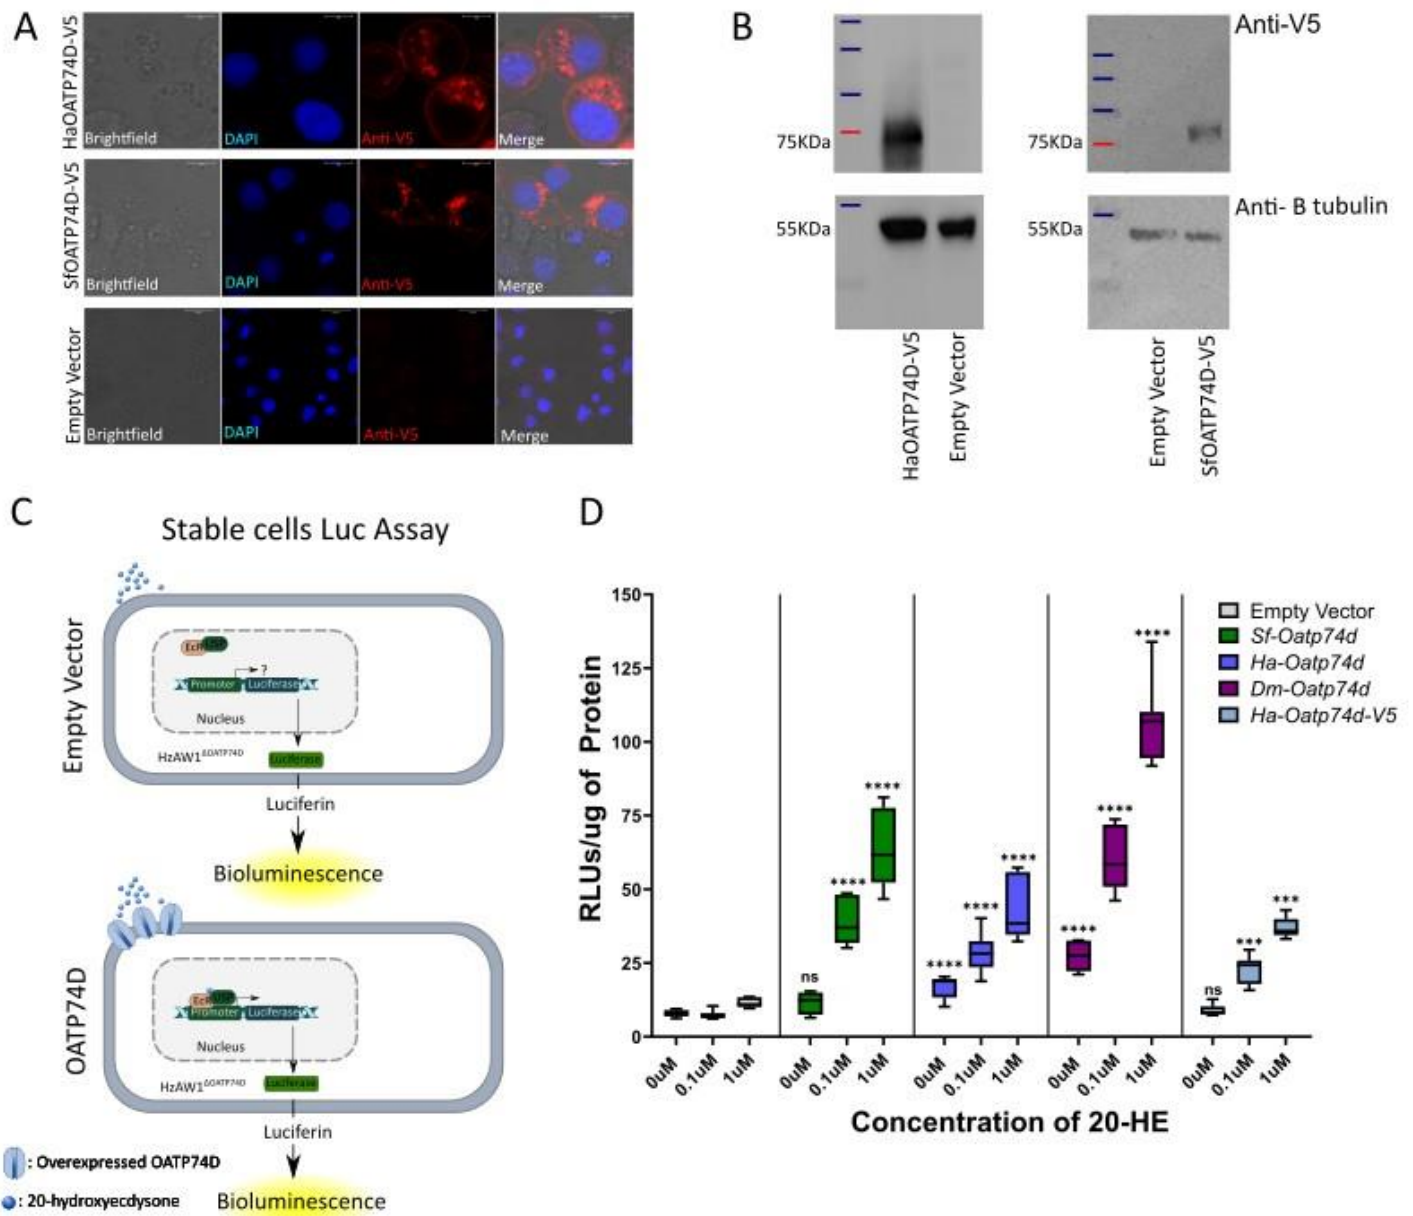

863

864

865

866

867

868

869

870

871

872

873 Fig. 5

A

### Stable cells Inhibition Assay

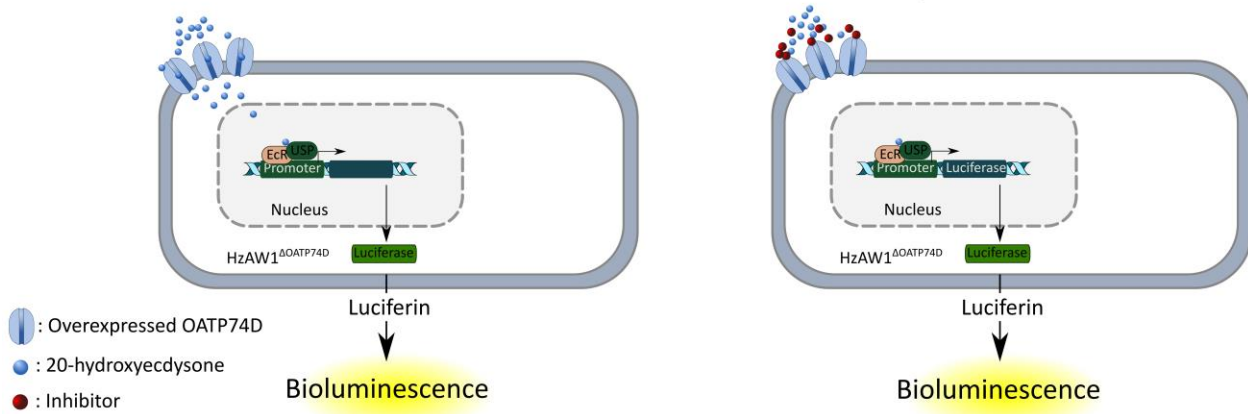

B

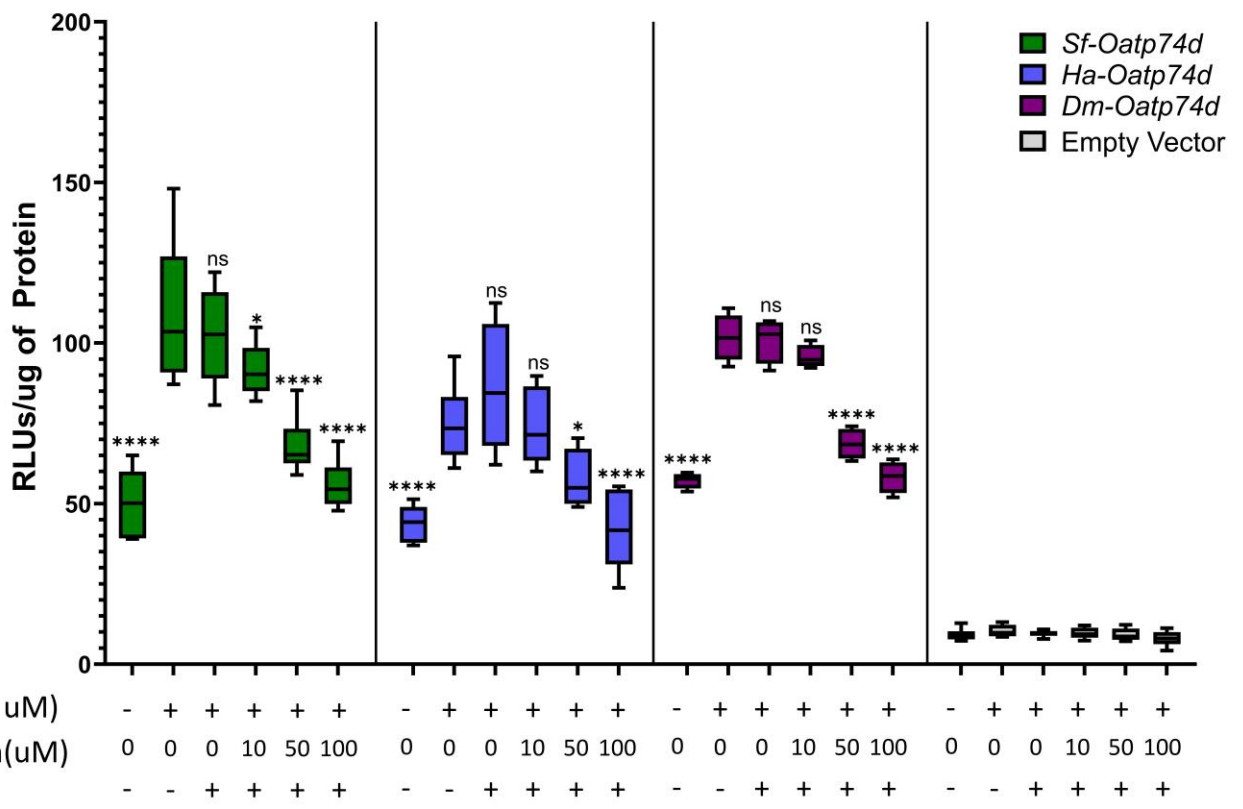

874

875

876

877

878

879

880

881

882

883 **Supplementary Files**

884 **Figures**

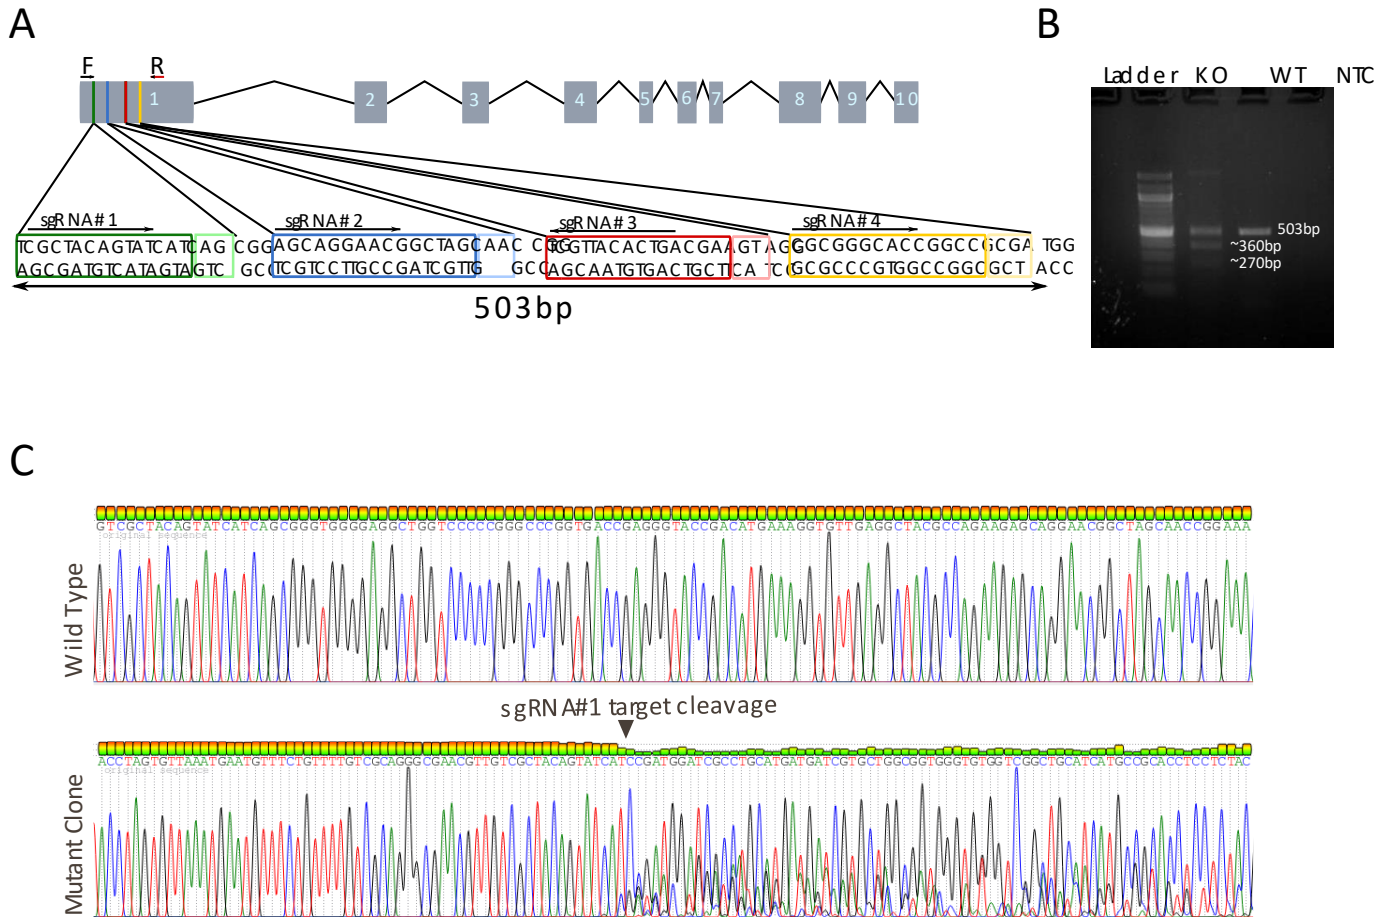

885

886

887 **S1 Fig. In vivo Characterization of Oatp74D in *S. frugiperda*.** (A) Schematic representation of the SfOatp74D gene  
 888 consisting of 10 exons. Four sgRNAs (#1, #2, #3 and #4) were designed to target the first exon of the gene spanning a  
 889 region of 503bp. F and R indicate the forward and reverse primers respectively used in PCR for diagnostic reasons.  
 890 (B) Diagnostic PCR screening yielding three fragments corresponding to a wild type (503bp product) and two  
 891 deletions (360bp and 270bp) in CRISPR injected eggs; WT and KO indicate wild type and knock-out, NTC: non-  
 892 template control. C) Sequencing chromatogram of region proximal to sgRNA#1 in wild type and mutant clone,  
 893 indicating the disruption of the chromatogram downstream of the target region.

894

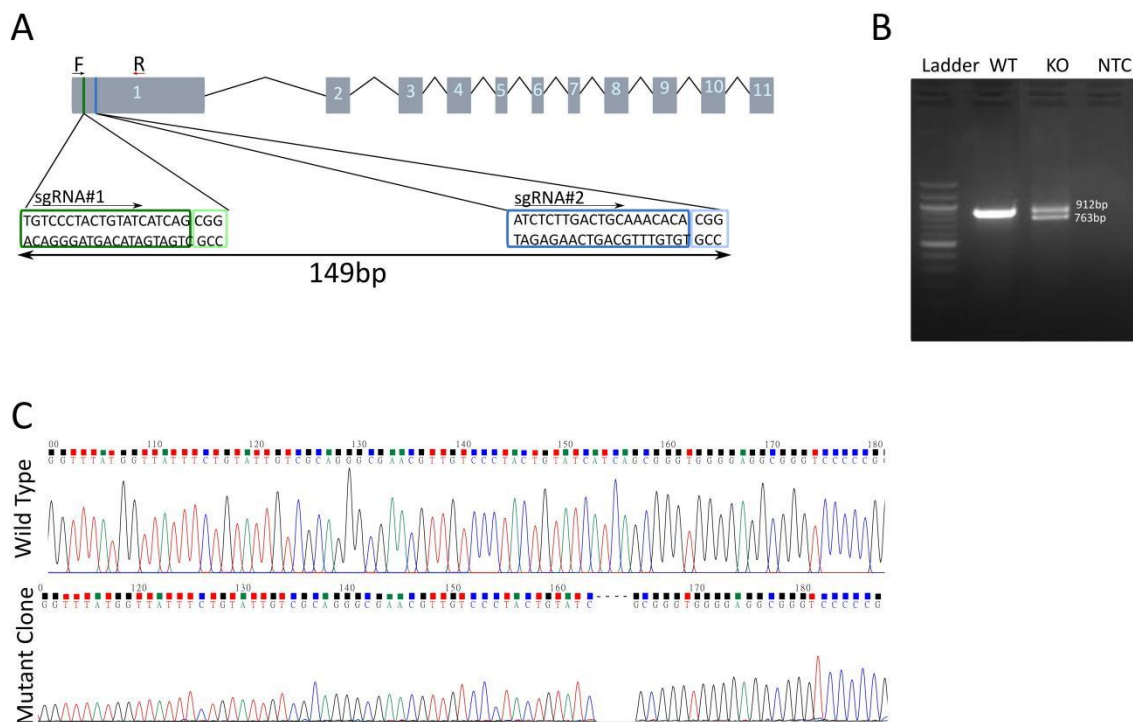

895

896 **S2 Fig. Characterization of Oatp74D in HzAW1 cell line.** (A) Schematic representation of the HzOatp74D gene  
 897 consisting of 11 exons. Two sgRNAs (#1 and #2) designed to target the first exon of the gene spanning a region of  
 898 149bp. F and R indicate the forward and reverse primers respectively used in PCR for diagnostic reasons. (B)  
 899 Diagnostic PCR indicating the expected deletion of 149 bp after transfection of HzAW1 cells; WT and KO indicate the  
 900 wild type and knock-out cells, NTC: non-template control. (C) Sequencing chromatogram of region proximal to  
 901 sgRNA#1 in wild type and mutant clone, indicating the deletion of the 4 bp (5'-ATCA-3').

902

903

904

905

906

907

908

909

910

911

912

913

914

915

916

917

918

919

920

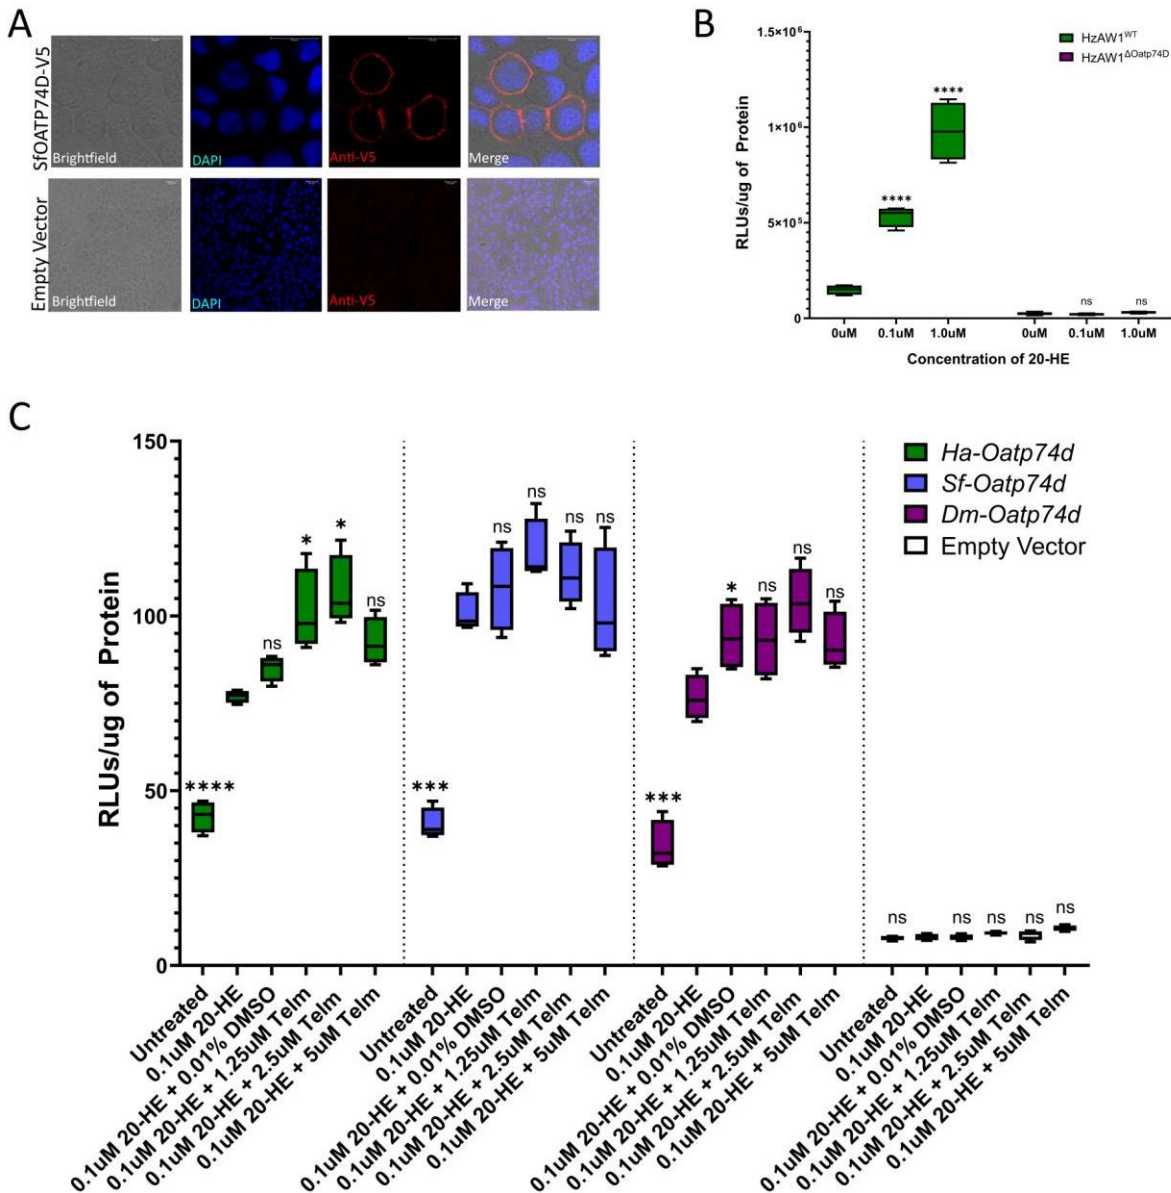

921

922

923 **S3 Fig.** (A) Subcellular localization of SfoATP74D and HaOATP74D tagged with V5 epitope in transiently transfected  
 924 Sf-9 cells. Blue indicates DAPI that counterstains nuclei, while Red indicates anti-V5, scale bar 20μM. (B) Luciferase  
 925 assay in HzAW1WT and HzAW1ΔOATP74D cell lines after treatment with 0.1μM and 1μM 20-HE post transfection  
 926 with the ecdysone responsive luciferase construct. Asterisks indicate statistically significant differences between the  
 927 treated and the untreated groups calculated with one-way ANOVA and post-Dunnett's test, \*\*\*\*p<0.0001. (C)  
 928 Inhibition analysis of lepidoptera OATP74D by Telmisartan in stable cell lines. The cell lines were incubated with  
 929 0.1μM of 20-HE in the presence of serial concentrations of Rifampicin (1.25μM, 2.5μM and 5μM) or DMSO (negative  
 930 control). Each group is represented by eight different technical replicates. Asterisks indicate statistical significance  
 931 between the different conditions versus treated only with 20-HE calculated with one-way ANOVA followed by post-  
 932 hoc Dunnett test, \*p<0.048, \*\*\*p<0.0008. ns: non-significant

933

934

935

936

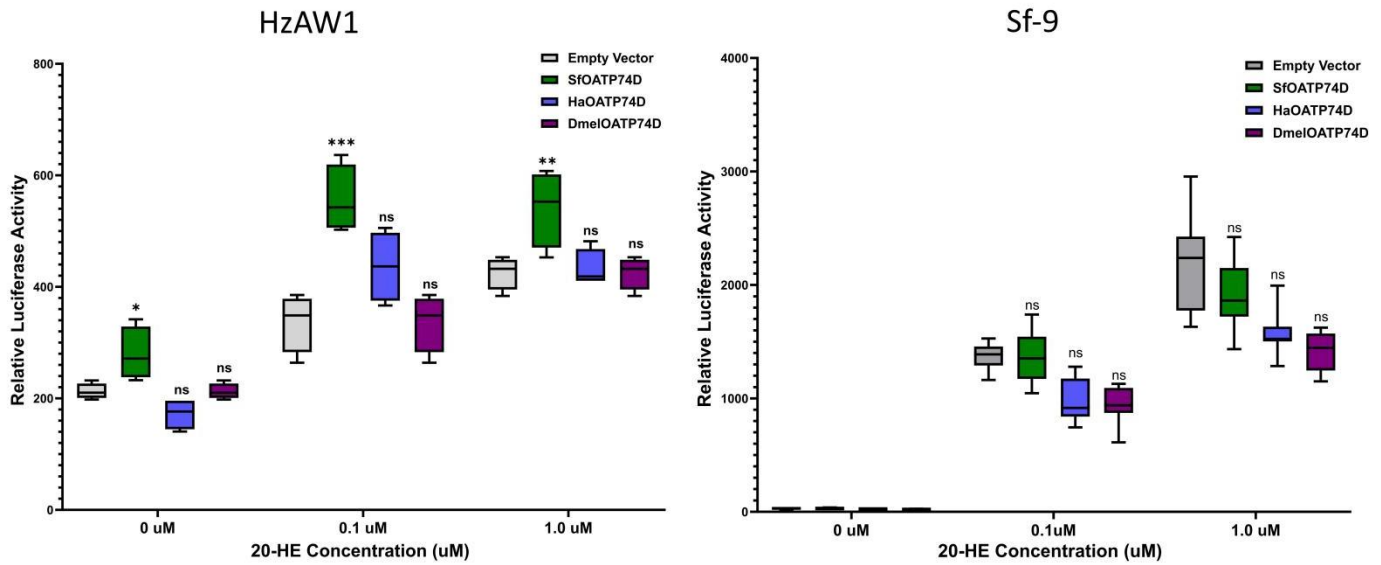

937

938 **S4 Fig.** Functional characterization of lepidopteran OATP74D transiently transfected in HzAW1WT (left) and Sf-9 cells  
939 (right). Cells were treated with several concentrations of 20-HE 72hrs post transfection and tested for luciferase  
940 expression 24hrs post treatment. Each group consists of four technical replicates and statistical significance was  
941 calculated by one-way ANOVA with post-Dunnett's test comparing cells overexpressing OATP74D with cells  
942 transfected with empty vector, \* $p < 0.033$ , \*\* $p < 0.0012$ , \*\*\* $p < 0.0008$ .

943

944

945

946

947

948

949

950

951

952

953

954

955

956

957

958

959

960

961



962

963 **Tables**

964

965 **S1 Table. List of GenBank accession numbers of the proteins used for the construction of the phylogenetic tree.**

| Species                                             | Number of ortholog | NCBI Gene ID |
|-----------------------------------------------------|--------------------|--------------|
| <i>Aedes aegypti</i> (yellow fever mosquito)        | 1                  | 5572461      |
|                                                     | 2                  | 5572460      |
|                                                     | 3                  | 5571480      |
|                                                     | 4                  | 5569501      |
|                                                     | 5                  | 5574116      |
|                                                     | 6                  | 5569498      |
| <i>Anopheles gambiae</i> (African malaria mosquito) | 1                  | 3291790      |
|                                                     | 2                  | 1275562      |
|                                                     | 3                  | 1277224      |
|                                                     | 4                  | 1279467      |
|                                                     | 5                  | 1277223      |
|                                                     | 6                  | 1279468      |
|                                                     | 7                  | 1268676      |
| <i>Apis mellifera</i> (honey bee)                   | 1                  | 409670       |
|                                                     | 2                  | 107965041    |
|                                                     | 3 *                | 100577409    |
|                                                     | 4                  | 409650       |
|                                                     | 5                  | 409649       |
|                                                     | 6                  | 726470       |
| <i>Ctenocephalides felis</i> (cat flea)             | 1                  | 113377690    |
|                                                     | 2                  | 113374981    |
|                                                     | 3 *                | 113376710    |
|                                                     | 4                  | 113368246    |
|                                                     | 5                  | 113368247    |
|                                                     | 6                  | 113374973    |
|                                                     | 7                  | 113374977    |
|                                                     | 8                  | 113374982    |
| <i>Daphnia magna</i>                                | 1                  | 116929909    |
|                                                     | 2                  | 116917617    |
|                                                     | 3 *                | 116925549    |
|                                                     | 4                  | 116932711    |
| <i>Dermatophagoides pteronyssinus</i>               | 1                  | 113795043    |
|                                                     | 2 *                | 113795044    |
|                                                     | 3                  | 113798940    |
|                                                     | 4                  | 113798932    |
|                                                     | 5                  | 113789382    |
|                                                     | 6                  | 113789383    |
| <i>Drosophila melanogaster</i> (fruit fly)          | 1                  | 34268        |
|                                                     | 2                  | 33927        |
|                                                     | 3                  | 37545        |
|                                                     | 4 *                | 39954        |
|                                                     | 5                  | 37543        |
|                                                     | 6                  | 34660        |
|                                                     | 7                  | 37544        |
|                                                     | 8                  | 34662        |

|                                                     |      |             |
|-----------------------------------------------------|------|-------------|
| <i>Folsomia candida</i>                             | 1    | 110854518   |
|                                                     | 2    | 110851675   |
|                                                     | 3    | 110858407   |
|                                                     | 4 *  | 110846602   |
|                                                     | 5    | 110851674   |
| <i>Helicoverpa armigera (cotton bollworm)</i>       | 1    | 110378947   |
|                                                     | 2    | 110380717   |
|                                                     | 3 *  | 110377536   |
|                                                     | 4    | 110376784   |
| <i>Hypsibius dujardini</i>                          | 1    | BV898_11360 |
|                                                     | 2    | BV898_04971 |
|                                                     | 3    | BV898_05593 |
|                                                     | 4    | BV898_07405 |
|                                                     | 5    | BV898_10426 |
|                                                     | 6    | BV898_00949 |
|                                                     | 7    | BV898_10403 |
|                                                     | 8    | BV898_01504 |
|                                                     | 9    | BV898_10404 |
|                                                     | 10   | BV898_10405 |
|                                                     | 11   | BV898_16684 |
|                                                     | 12   | BV898_10407 |
|                                                     | 13   | BV898_10410 |
|                                                     | 14   | BV898_01677 |
|                                                     | 15   | BV898_00899 |
| <i>Limulus polyphemus (Atlantic horseshoe crab)</i> | 1    | 106460006   |
|                                                     | 2    | 106470936   |
|                                                     | 3    | 106469001   |
|                                                     | 4 *  | 106458779   |
|                                                     | 5 *  | 106467456   |
|                                                     | 6    | 106462005   |
|                                                     | 7    | 106465503   |
|                                                     | 8    | 106473599   |
|                                                     | 9    | 106478780   |
|                                                     | 10   | 106475309   |
|                                                     | 11 * | 106474691   |
|                                                     | 12 * | 106471432   |
|                                                     | 13 * | 106476799   |
| <i>Myzus persicae (green peach aphid)</i>           | 1 *  | 111036156   |
|                                                     | 2    | 111041601   |
|                                                     | 3    | 111027674   |
|                                                     | 4    | 111029574   |
| <i>Necator americanus</i>                           | 1    | 25345720    |
|                                                     | 2    | 25342589    |
|                                                     | 3    | 25340106    |
| <i>Penaeus monodon (black tiger shrimp)</i>         | 1    | 119590666   |
|                                                     | 2    | 119581163   |
|                                                     | 3    | 119573412   |
|                                                     | 4    | 119576950   |
|                                                     | 5    | 119575357   |
|                                                     | 6    | 119576958   |
|                                                     | 7    | 119586931   |

|                                                      |                                              |           |           |
|------------------------------------------------------|----------------------------------------------|-----------|-----------|
|                                                      | 8 *                                          | 119572367 |           |
|                                                      | 9                                            | 119573367 |           |
|                                                      | 10                                           | 119577366 |           |
| <i>Photinus pyralis</i> (common eastern firefly)     | 1                                            | 116165455 |           |
|                                                      | 2 *                                          | 116168080 |           |
|                                                      | 3                                            | 116165826 |           |
| <i>Priapulus caudatus</i>                            | 1                                            | 106806388 |           |
|                                                      | 2                                            | 106806870 |           |
|                                                      | 3                                            | 106805194 |           |
|                                                      | 4                                            | 106817401 |           |
|                                                      | 5                                            | 106806142 |           |
|                                                      | 6                                            | 106805147 |           |
|                                                      | 7                                            | 106815843 |           |
|                                                      | 8                                            | 106809721 |           |
|                                                      | 9                                            | 106808907 |           |
|                                                      | 10                                           | 106816573 |           |
|                                                      | 11                                           | 106811464 |           |
|                                                      | 12                                           | 106815058 |           |
|                                                      | 15                                           | 106808974 |           |
|                                                      | <i>Rotaria sordida</i>                       | 1         | 56291     |
|                                                      | <i>Spodoptera frugiperda</i> (fall armyworm) | 1         | 118278495 |
| 2                                                    |                                              | 118274558 |           |
| 3 *                                                  |                                              | 118271297 |           |
| 5                                                    |                                              | 118278212 |           |
| 6                                                    |                                              | 118278156 |           |
| <i>Strongyloides ratti</i>                           | 1                                            | 36375791  |           |
|                                                      | 2                                            | 36380248  |           |
|                                                      | 3                                            | 36373428  |           |
|                                                      | 4                                            | 36375784  |           |
| <i>Tetranychus urticae</i> (two-spotted spider mite) | 1 *                                          | 107366484 |           |
|                                                      | 2                                            | 107360496 |           |
| <i>Trichinella spiralis</i>                          | 1                                            | 10910173  |           |
|                                                      | 2                                            | 10911142  |           |
|                                                      | 3                                            | 10912168  |           |
|                                                      | 4                                            | 10910086  |           |
|                                                      | 5                                            | 10912156  |           |
|                                                      | 6                                            | 10904092  |           |
|                                                      | 7                                            | 10911118  |           |
|                                                      | 8                                            | 10910174  |           |
|                                                      | 9                                            | 10904090  |           |

966 (\*) indicates orthologs represented on the Oatp74D clade

967 **S2 Table. List of primers used in this study.**

968

| Primer Name                | Sequence                                                                                | Experimental Use                                                                                                                          |
|----------------------------|-----------------------------------------------------------------------------------------|-------------------------------------------------------------------------------------------------------------------------------------------|
| Sf_OatP74D_CDS_F           | ATGGATAGACGGCCAATAAAA                                                                   | seq of CRISPR target                                                                                                                      |
| Sf_OatP74D_CR_R            | CCATGTAAAGTGGTGACTIONGCC                                                                |                                                                                                                                           |
| Sf_oatp74D_amplicon.seq. F | CAGGTTTGTAAATACCTAGTG                                                                   | amplicon seq of CR. target                                                                                                                |
| Sf_oatp74D_amplicon.seq. R | GACCACACCCACCGCCAGCAC                                                                   |                                                                                                                                           |
| CRISPR universal           | AAAAGCACCGACTCGGTGCCACTTTTTCAAGTTGATAACGGACTAGCCTTATTTAACTTGCTATTCTAGCTCTAAAAC          | sgRNA synthesis                                                                                                                           |
| Sf_OatP74D_long_1          | GAAATTAATACGACTCACTATAGGTCGCTACAGTATCATCAGCGTTTTAGAGCTAGAAATAGC                         |                                                                                                                                           |
| Sf_OatP74D_long_2          | GAAATTAATACGACTCACTATAGGAGCAGGAACGGCTAGCAACGTTTTAGAGCTAGAAATAGC                         |                                                                                                                                           |
| Sf_OatP74D_long_3          | GAAATTAATACGACTCACTATAGGTCGTTACACTGACGAAGTGTAGAGCTAGAAATAGC                             |                                                                                                                                           |
| Sf_OatP74D_long_4          | GAAATTAATACGACTCACTATAGGCGCGGGCACCGGCCGCGAGTTTTAGAGCTAGAAATAGC                          | Cloning of Sf_oatp74D in pUAST-attB                                                                                                       |
| Sf-OATP74D-NotI-F          | GAATTGGGAATTCGTTAACAGATCTGCGCGGCCGCATGACGGCGAACGTTGTC                                   |                                                                                                                                           |
| Sf-OATP74D-XbaI-R          | ATCCTCTAGAGGTACCTCGAGCCGCTCTAGATCAGAGTTGTGTATCGGATGGGTTTG                               | Cloning <i>SfOatp74D</i> in pBmAc3                                                                                                        |
| Sf-OATP74D-XbaI-F          | GTACtctagaATGACGGCGAACGTTGTC                                                            |                                                                                                                                           |
| Sf-OATP74D-NotI-R          | GTACgcgccgcTCAGAGTTGTGTATCGGATGGGTTTG                                                   | Cloning of tagged with V5 epitope <i>SfOatp74D</i> in pBmAc3                                                                              |
| Sf-OATP74D-BspEI-V5-NotI-R | GTACgcgccgcTCAGGTAGAGTCCAGACCCAGCAGAGGGTTAGGGATAGGCTTACCTCCGGAACCGAGTGTGTATCGGATGGGTTTG |                                                                                                                                           |
| Dm-OATP74D-XbaI-F          | GTACtctagaATGACGAAGAGCAATGGCGATG                                                        | Cloning <i>DmOatp74D</i> in pBmAc3                                                                                                        |
| Dm-OATP74D-NotI-R          | GTACgcgccgcCTAGACCGTCGTGCCGGC                                                           |                                                                                                                                           |
| Ha-OATP74D-BamHI-F         | GTACggatccATGACGGCGAACGTTGTC                                                            | Cloning of tagged with V5 epitope <i>HaOatp74D</i> in pBmAc3                                                                              |
| HaOATP74D-BspEI-R          | GTACTccggaACC GAGCTGAGTGTCTGGACGAG                                                      |                                                                                                                                           |
| pEIA-Fgibson               | AGTCGTTTGGTTGTTACG                                                                      | Primers used for the synthesis of the novel plasmid piE1:puro-BmAc3 (small letters indicate complementary sequences with the pEIA vector) |
| pEIA-Rgibson               | TTATACATATCTTTGAATTTAATTAATTATACATATATTTATATTATTTTG                                     |                                                                                                                                           |
| PAC-Fgibson-Ascl           | taaattcaaaagatatgtataaggcgccTCAGGCACCGGGCTTGCG                                          |                                                                                                                                           |
| PAC-Rgibson-Ncol           | gtgaacaaccaaacgactcctatggATGACCGAGTACAAGCCCCAG                                          | Phosphorylated primers used for generating dsDNA for cloning into BbsI digested pBmAc3:Cac9-HaU6:1 vector                                 |
| Hz_OATP74D_F_sgRNA#1       | CAAGGCTATTCCTGACGTACCTGG                                                                |                                                                                                                                           |
| Hz_OATP74D_R_sgRNA#1       | AAACCCAGGTACGTGAGGAATAGC                                                                |                                                                                                                                           |
| Hz_OATP74D_F_sgRNA#2       | CAAGGTGTCCCTACTGTATCATCAG                                                               |                                                                                                                                           |
| Hz_OATP74D_R_sgRNA#2       | AAACTGATGATACAGTAGGGACAC                                                                |                                                                                                                                           |
| Hz_OATP74D_F_sgRNA#3       | CAAGGATCTCTTGACTGCAAACACA                                                               |                                                                                                                                           |
| Hz_OATP74D_R_sgRNA#3       | AAACTGTGTTTGCAGTCAAGAGATC                                                               | Genotyping of CRISPR mediated deletion yielding a                                                                                         |
| HzOATP74D-F-5UTR           | GGTCACATAGACTTGATAGCATAG                                                                |                                                                                                                                           |

|                      |                              |                                                                                                                                                                                                |
|----------------------|------------------------------|------------------------------------------------------------------------------------------------------------------------------------------------------------------------------------------------|
| HzOATP74D-R-exon1    | GTTGTCCCTACTGTATCATCAGC      | <p>PCR fragment equal to 912bp</p> <p>Primers used for gene expression analysis of ecdysone responsive genes</p> <p>RT-PCR validation of <i>Oatp74D</i> expression in Sf-9 and HzAW1 cells</p> |
| Hz_HR3_F             | CTCTTGAAATCTGGCTCGTTTCG      |                                                                                                                                                                                                |
| Hz_HR3_R             | CACACATTCTCTGATGGACAGCAC     |                                                                                                                                                                                                |
| Hz_E74A_F            | GTGGAGTCGTCTTCATCAGG         |                                                                                                                                                                                                |
| Hz_E74A_R            | CTGGTGGTGGCTGGTAGAAG         |                                                                                                                                                                                                |
| Hz_EcR_F             | CAACAACCAGGCGTACACTC         |                                                                                                                                                                                                |
| Hz_EcR_R             | CAGCGTGTTTCAGGTAATATCTCTGGAT |                                                                                                                                                                                                |
| Hz_Eip75B_F          | CCTCAACGGCGTGGTGAAA          |                                                                                                                                                                                                |
| Hz_Eip75B_R          | GAGTGGGTTGCGAGTAGGTG         |                                                                                                                                                                                                |
| caspase-3 qPCR_F     | ATGTGTGTCACTATCCTAAGCCAC     |                                                                                                                                                                                                |
| caspase-3 qPCR_R     | AGCATCCATACTAGCACCTCTG       |                                                                                                                                                                                                |
| caspase-6 qPCR_F     | GCTGTGATCAGTGCTACGGAT        |                                                                                                                                                                                                |
| HzAW1_GADPH_F        | GAACATCATTCCCGCCTCCA         |                                                                                                                                                                                                |
| HzAW1_GADPH_R        | TCGGATGACACAACCTGCTC         |                                                                                                                                                                                                |
| HzAW1_RPS3A_F        | GCTCATCCCCGACTCCATTG         |                                                                                                                                                                                                |
| HzAW1_RPS3A_R        | CTTGCCACCACCACCTTCTC         |                                                                                                                                                                                                |
| caspase-6 qPCR_R     | CCGAATCAGCTGCATACATT         |                                                                                                                                                                                                |
| Sf9_Ecl_q-RT-PCR_F   | ACTGACAGACAAGACAAAGCGATG     |                                                                                                                                                                                                |
| Sf9_Ecl_q-RT-PCR_R   | CCTTGCTCCACACCAAAATGTC       |                                                                                                                                                                                                |
| HzAW1_Ecl_q-RT-PCR_F | ACTGATAAACAAGACAAAGCGATGG    |                                                                                                                                                                                                |
| HzAW1_Ecl_q-RT-PCR_R | AGGAACATTAGGGTTGCTGATAG      |                                                                                                                                                                                                |

969 **S3 Table. List of plasmids used in this study.**

| Construct                                                                                                                                                                                                                                                                                                                                                                                                       | Experimental Procedure                                                                        | Identifier/Reference                                                                                                                     |
|-----------------------------------------------------------------------------------------------------------------------------------------------------------------------------------------------------------------------------------------------------------------------------------------------------------------------------------------------------------------------------------------------------------------|-----------------------------------------------------------------------------------------------|------------------------------------------------------------------------------------------------------------------------------------------|
| <p>pEIA<br/>pBmAc3<br/>pFastBac1-HaOATP74D<br/>pBmAc3:Cac9-HaU6:1<br/>pUAST-attB</p>                                                                                                                                                                                                                                                                                                                            | <p><i>In vitro assays - Cell culture</i></p> <p><i>Drosophila</i> Heterologous Expression</p> | <p>Douris et al., 2006<br/>Samantsidis et al., 2021<br/>GenScript<br/>Samantsidis et al., 2021<br/>(Bischof et. al 2007; DRGC #1419)</p> |
| <p>pBmAc3-HaOATP74D<br/>pBmAc3-SfOATP74D<br/>pBmAc3-DmOATP74D<br/>piE1:Zeocin-BmAc3-HaOATP74D<br/>piE1:Zeocin-BmAc3-SfOATP74D<br/>piE1:Zeocin-BmAc3-DmOATP74D<br/>piE1:Zeocin-BmAc3-HaOATP74D-V5<br/>piE1:Zeocin-BmAc3-SfOATP74D-V5<br/>pBmAc3:Cac9-HaU6:1-sgRNA#1<br/>pBmAc3:Cac9-HaU6:1-sgRNA#2<br/>pBmAc3:Cac9-HaU6:1-sgRNA#3<br/>pUAST-attB-HaOATP74D<br/>pUAST-attB-SfOATP74D<br/>pUAST-attB-DmOATP74D</p> | <p><i>In vitro assays - Cell culture</i></p> <p><i>Drosophila-Heterologous Expression</i></p> | <p>This study</p>                                                                                                                        |

970

971

972

973

974

975

976

977

978

979

980 **S4 Table. Mortality scores monitored post injection of *S. frugiperda* targeting the *Oatp74D* or *Scarlet* genes.**

| Genotype       | Plate | Eggs | Hatched | Hatching Rate Percentile | L1 | L5 | L1-L5 Percentile | Overall Mortality | Survival%   | Average Hatching Rate | Average L1-L5 Trans. | Average Surviv. |
|----------------|-------|------|---------|--------------------------|----|----|------------------|-------------------|-------------|-----------------------|----------------------|-----------------|
| <i>Oatp74D</i> | 1     | 87   | 10      | 11.49425287              | 10 | 0  | 0                | 0                 | 0           |                       |                      |                 |
| <i>Oatp74D</i> | 2     | 86   | 16      | 18.60465116              | 16 | 2  | 12.5             | 2.325581395       | 0.125       |                       |                      |                 |
| <i>Oatp74D</i> | 3     | 91   | 6       | 6.593406593              | 6  | 1  | 16.66666667      | 1.098901099       | 0.166666667 | 10.2433881            | 25.09920635          | 25.09920635     |
| <i>Oatp74D</i> | 1     | 83   | 7       | 8.43373494               | 7  | 3  | 42.85714286      | 3.614457831       | 0.428571429 |                       |                      |                 |
| <i>Oatp74D</i> | 2     | 81   | 7       | 8.641975309              | 7  | 2  | 28.57142857      | 2.469135802       | 0.285714286 |                       |                      |                 |
| <i>Oatp74D</i> | 3     | 78   | 6       | 7.692307692              | 6  | 3  | 50               | 3.846153846       | 0.5         |                       |                      |                 |
| control        | 1     | 62   | 38      | 61.29032258              | 38 | 33 | 86.84210526      | 53.22580645       | 0.868421053 |                       |                      |                 |
| control        | 2     | 67   | 36      | 53.73134328              | 36 | 34 | 94.44444444      | 50.74626866       | 0.944444444 |                       |                      |                 |
| control        | 3     | 77   | 26      | 33.76623377              | 26 | 24 | 92.30769231      | 31.16883117       | 0.923076923 | 38.14563663           | 85.60785868          | 85.60785868     |
| control        | 1     | 80   | 25      | 31.25                    | 25 | 20 | 80               | 25                | 0.8         |                       |                      |                 |
| control        | 2     | 82   | 27      | 32.92682927              | 27 | 22 | 81.48148148      | 26.82926829       | 0.814814815 |                       |                      |                 |
| control        | 3     | 88   | 14      | 15.90909091              | 14 | 11 | 78.57142857      | 12.5              | 0.785714286 |                       |                      |                 |

981  
982

983 **S5 Table. P-values of Student's t-test for un-paired comparisons in gene expression analysis between the**  
984 **HzAW1WT and HzAW1Δ*Oatp74D* cells.**

|              | <i>HzEcR</i> | <i>HzHr3</i> | <i>HzEip74A</i> | <i>HzEip75B</i> |
|--------------|--------------|--------------|-----------------|-----------------|
| <b>6hrs</b>  | 0.0053       | 0.0032       | 0.0046          | 0.4597          |
| <b>9hrs</b>  | 0.0048       | <0.0001      | 0.0321          | 0.0011          |
| <b>12hrs</b> | 0.0031       | 0.0002       | 0.0451          | 0.003           |
| <b>24hrs</b> | 0.0379       | <0.0001      | 0.026           | 0.0744          |

985

986
